# Supplementary material for: Nine New Pregnane Glycosides from the Cultivated Medicinal Plant Marsdenia tenacissima
Source: MDPI journal article supplement (doi:10.3390/molecules28062705), 2023-03-16
Supplement: s1 [file s1]

*Supplementary material*

# Nine New Pregnane Glycosides from the Cultivated Medicinal Plant *Marsdenia tenacissima*

Qian-Qian Meng <sup>1,2</sup>, Shun-Yao Tong <sup>2</sup>, Xing-Rong Peng <sup>3</sup>, Yu-Qing Zhao <sup>1</sup>, Zheng-Hui Li <sup>2</sup>,  
He-Ping Chen <sup>2,\*</sup> and Ji-Kai Liu <sup>1,2,\*</sup>

<sup>1</sup> School of Pharmacy, Anhui University of Chinese Medicine, Hefei 230012, China

<sup>2</sup> School of Pharmaceutical Sciences, South-Central Minzu University, Wuhan 430074, China

<sup>3</sup> State Key Laboratory of Phytochemistry and Plant Resources in West China, Kunming Institute of Botany, Chinese Academy of Sciences, Kunming 650201, China

\* Correspondence: chenhp@mail.scuec.edu.cn (H.-P.C.); liujikai@mail.scuec.edu.cn (J.-K.L.);  
Tel.: +86-27-67841275 (J.-K.L.); Fax: +86-27-67841275 (J.-K.L.)

## Contents of Supporting Information

- Detailed Experimental Procedure
- Figure S1-S6 NMR spectra of Marsdeoside A (1)
- Figure S7 HRESIMS spectrum of Marsdeoside A (1)
- Figure S8-S13 NMR spectra of Marsdeoside B (2)
- Figure S14 HRESIMS spectrum of Marsdeoside B (2)
- Figure S15-S20 NMR spectra of Marsdeoside C (3)
- Figure S21 HRESIMS spectrum of Marsdeoside C (4)
- Figure S22-27 NMR spectra of Marsdeoside D (4)
- Figure S28 HRESIMS spectrum of Marsdeoside D (4)
- Figure S29-34 NMR spectra of Marsdeoside E (5)
- Figure S35 HRESIMS spectrum of Marsdeoside E (5)
- Figure S36-41 NMR spectra of Marsdeoside F (6)
- Figure S42 HRESIMS spectrum of Marsdeoside F (6)
- Figure S43-48 NMR spectra of Marsdeoside G (7)
- Figure S49 HRESIMS spectrum of Marsdeoside G (7)
- Figure S50-55 NMR spectra of Marsdeoside H (8)
- Figure S56 HRESIMS spectrum of Marsdeoside H (8)
- Figure S57-62 NMR spectra of Marsdeoside H (9)
- Figure S63 HRESIMS spectrum of Marsdeoside H (9)

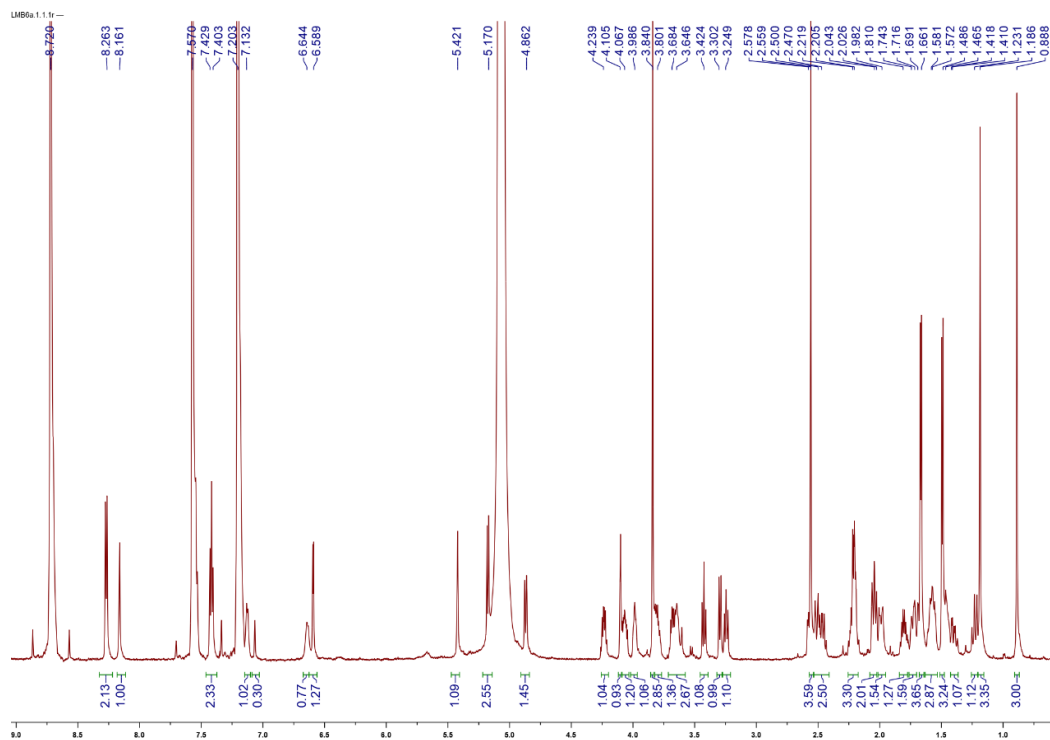

Figure S1. <sup>1</sup>H NMR (600 MHz, Pyridine-d<sub>5</sub>) spectrum of Marsdeoside A (1).

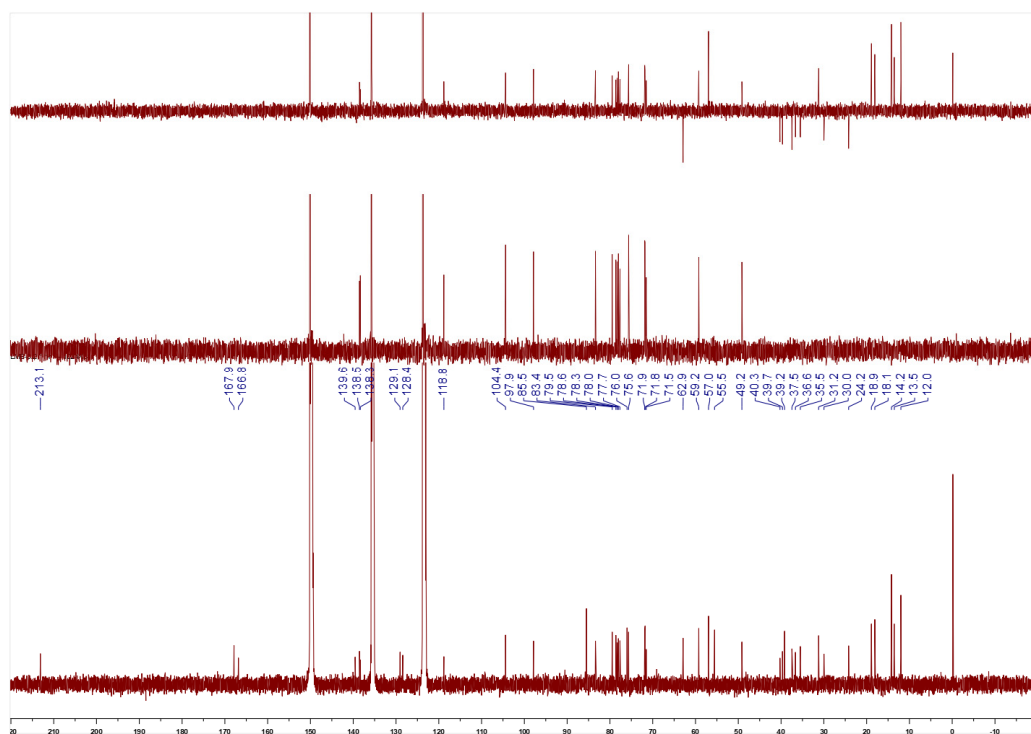

Figure S2.  $^{13}\text{C}$  NMR (150 MHz, Pyridine- $\text{d}_5$ ) spectrum of Marsdeoside A (1).

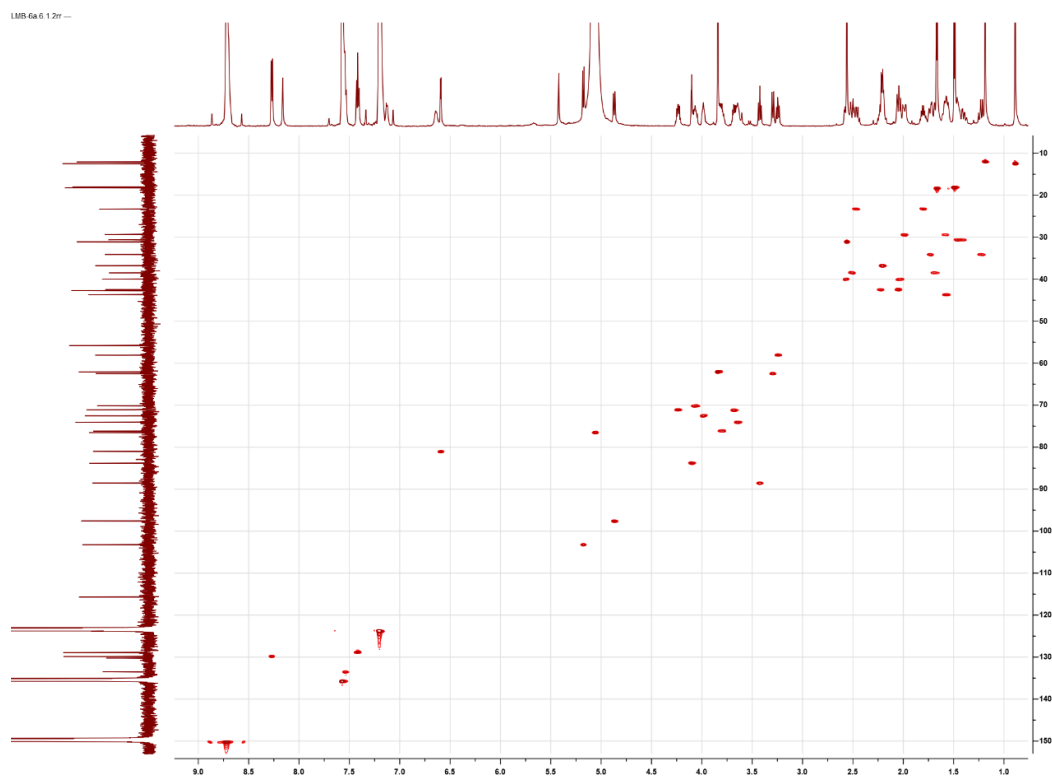

Figure S3. HSQC (600/150 MHz, Pyridine- $\text{d}_5$ ) spectrum of Marsdeoside A (1).

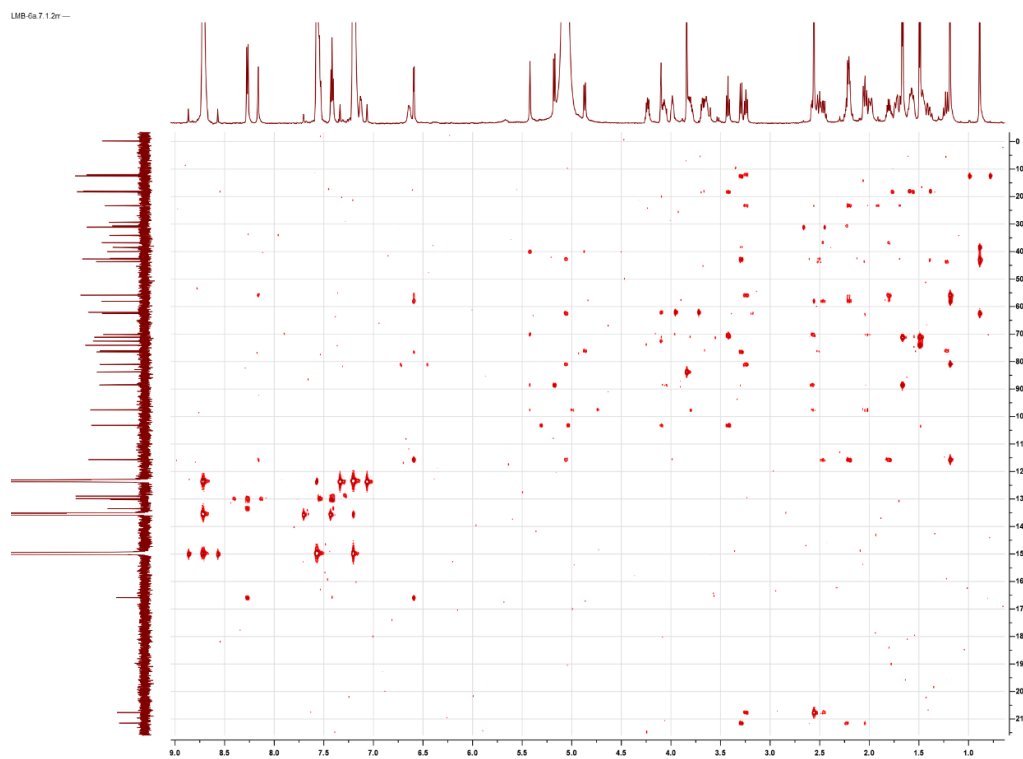

**Figure S4.** HMBC (600/150 MHz, Pyridine- $\text{d}_5$ ) spectrum of Marsdeoside A (**1**).

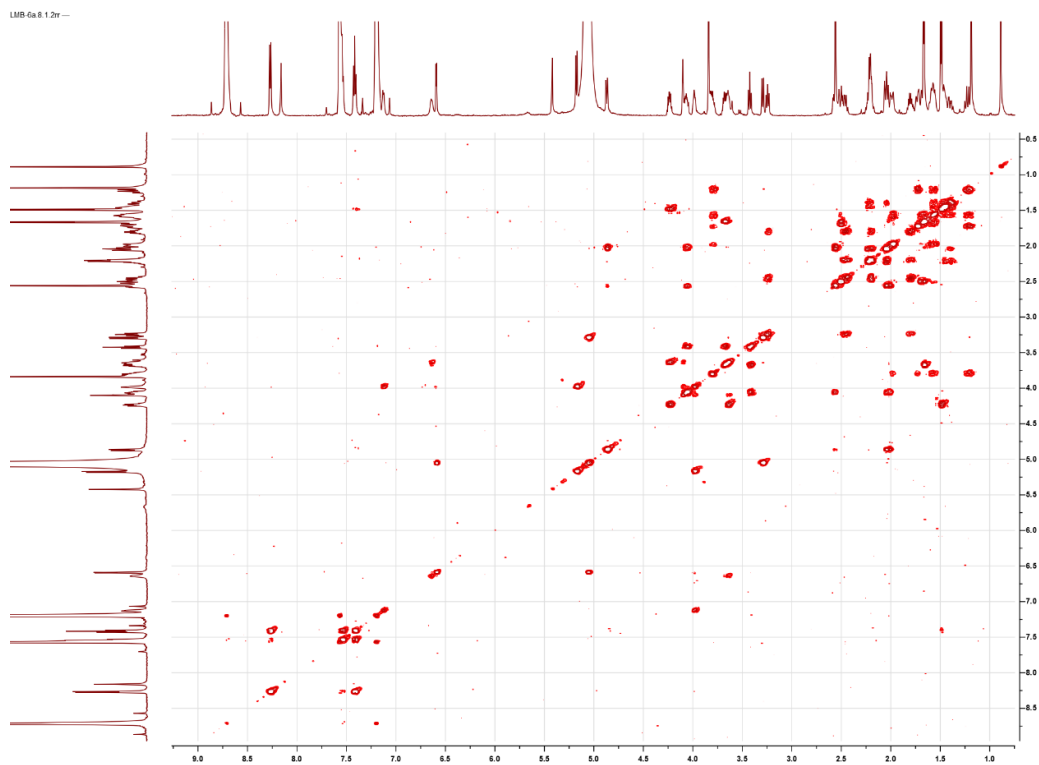

**Figure S5.**  $^1\text{H}$ - $^1\text{H}$  COSY (600/150 MHz, Pyridine- $\text{d}_5$ ) spectrum of Marsdeoside A (**1**).



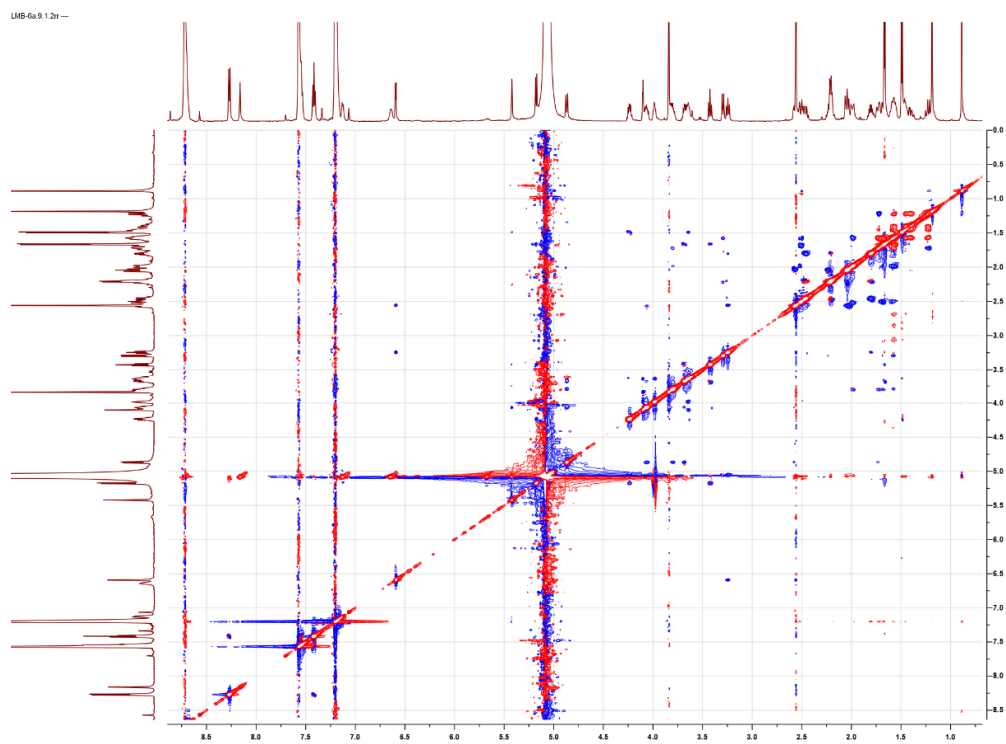

**Figure S6.** NOESY (600/150 MHz, Pyridine- $d_5$ ) spectrum of Marsdeoside A (**1**).

T: FTMS + p ESI Full ms [400.0000-1000.0000]

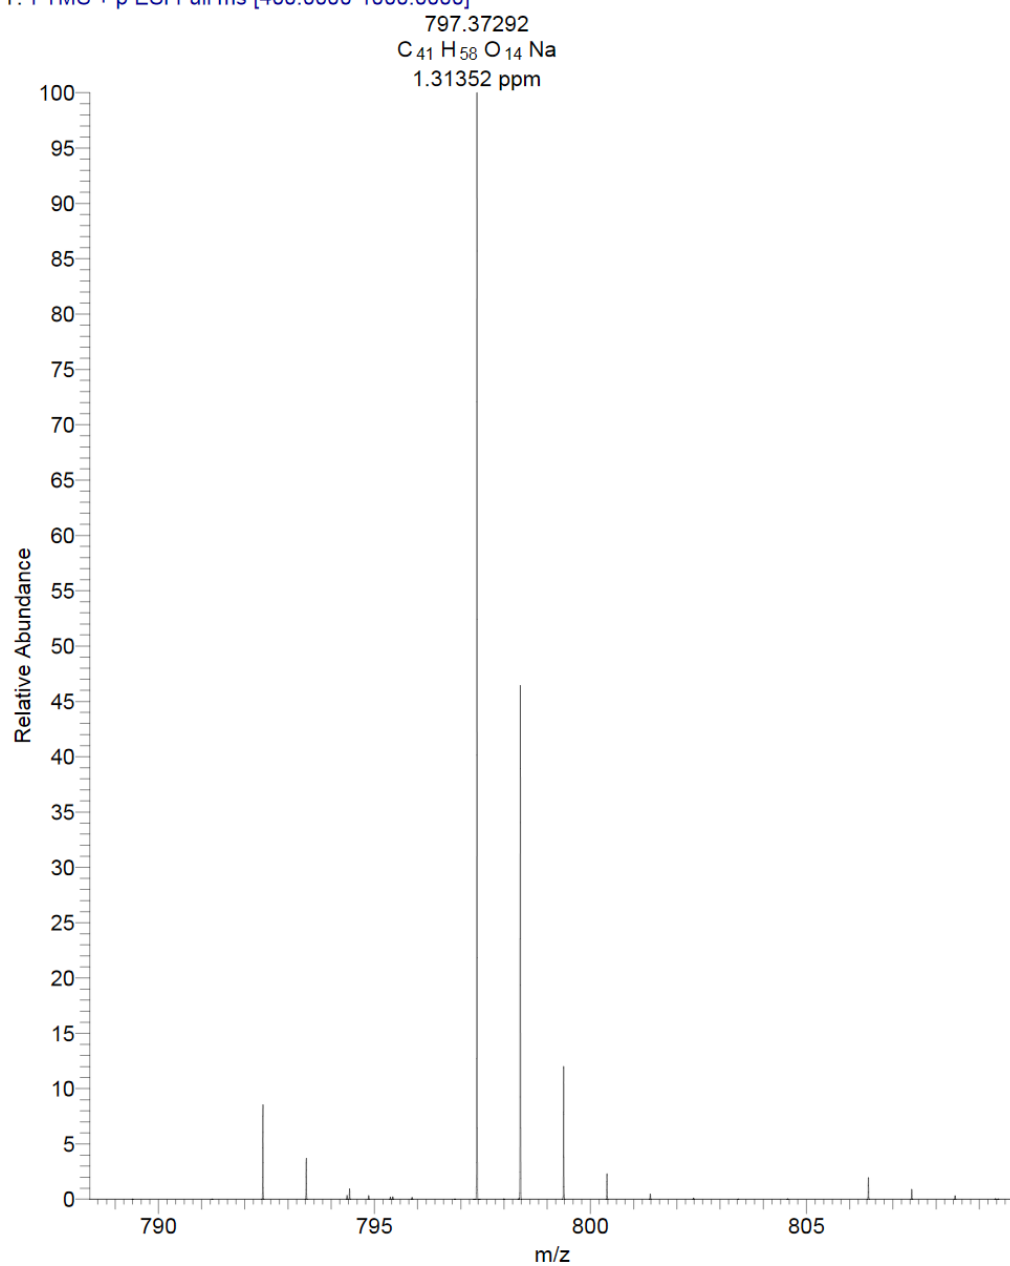

**Figure S7.** HRESIMS spectrum of Marsdeoside A (**1**).

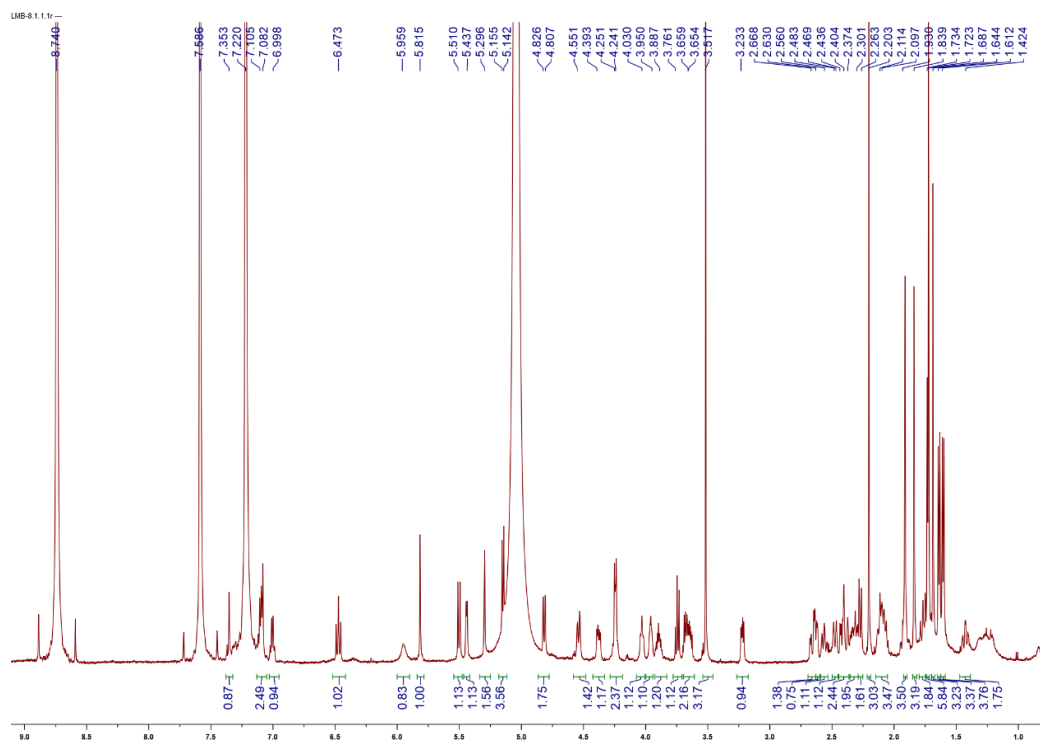

Figure S8. <sup>1</sup>H NMR (600 MHz, Pyridine-d<sub>5</sub>) spectrum of Marsdeoside B (2).

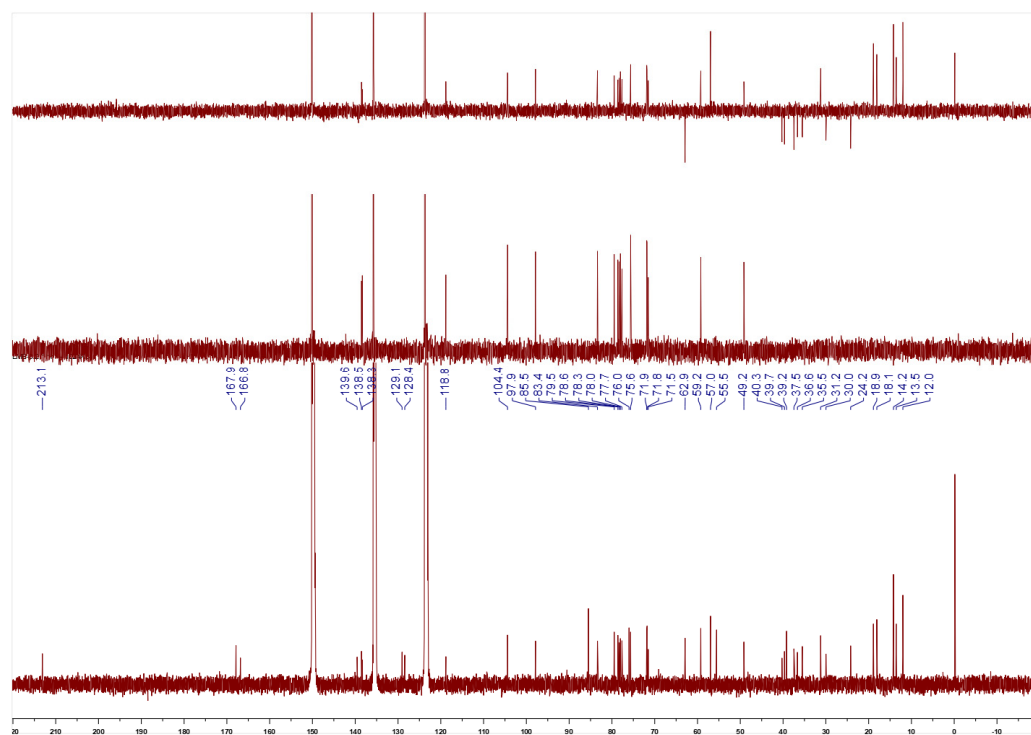

Figure S9. <sup>13</sup>C NMR (150 MHz, Pyridine-d<sub>5</sub>) spectrum of Marsdeoside B (2).

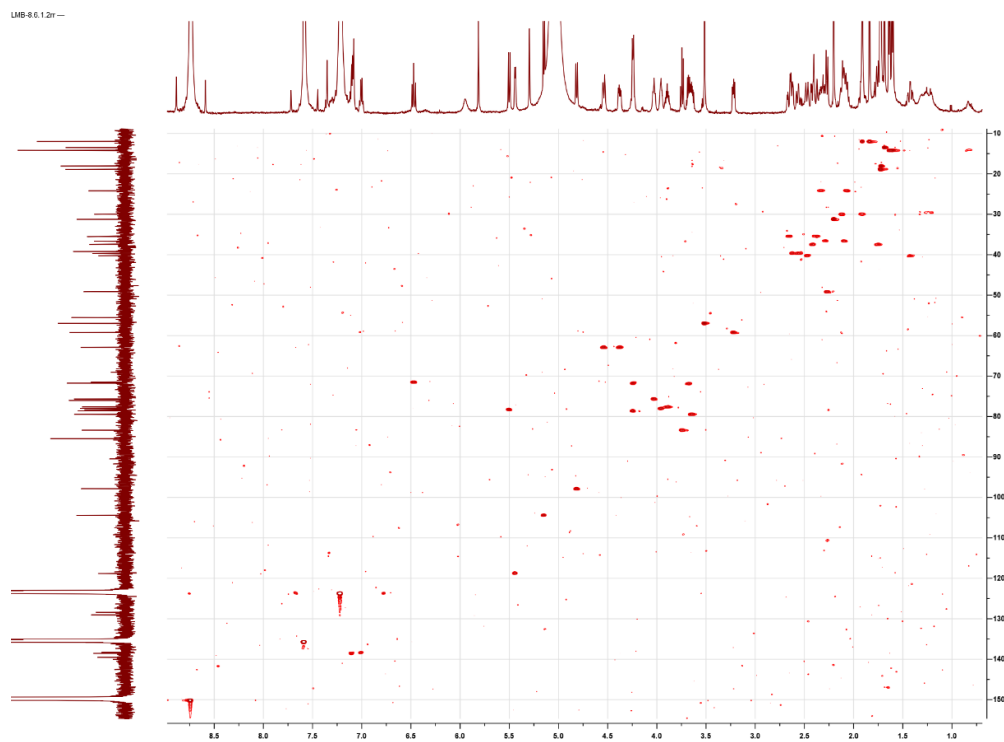

**Figure S10.** HSQC (600/150 MHz, Pyridine-d<sub>5</sub>) spectrum of Marsdeoside B (**2**).

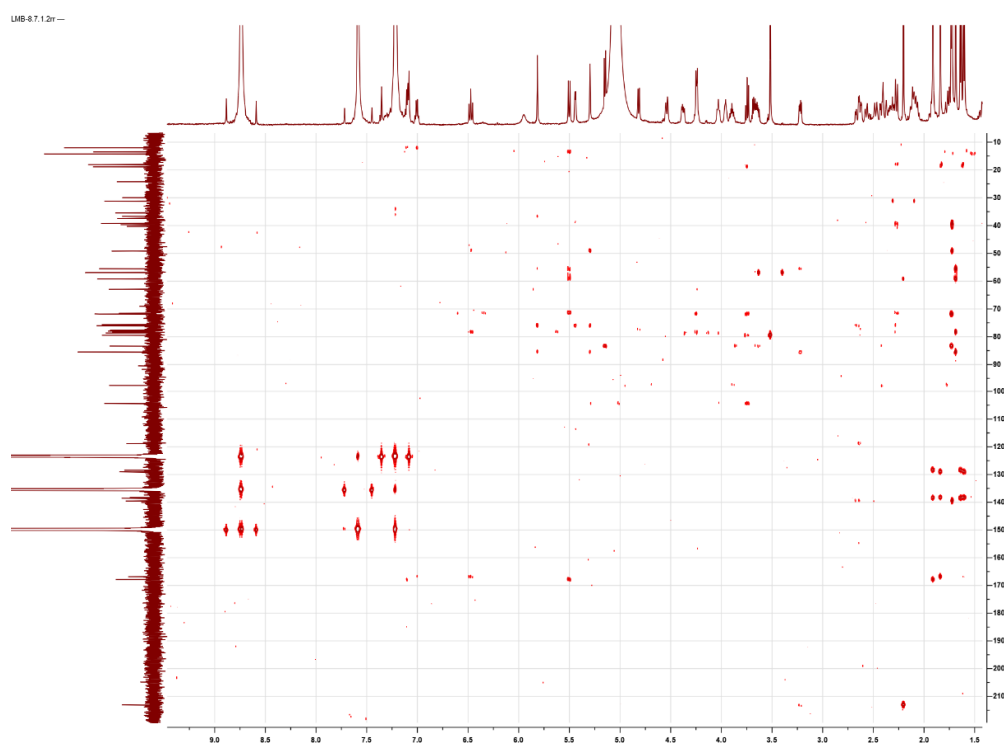

**Figure S11.** HMBC (600/150 MHz, Pyridine-d<sub>5</sub>) spectrum of Marsdeoside B (**2**).

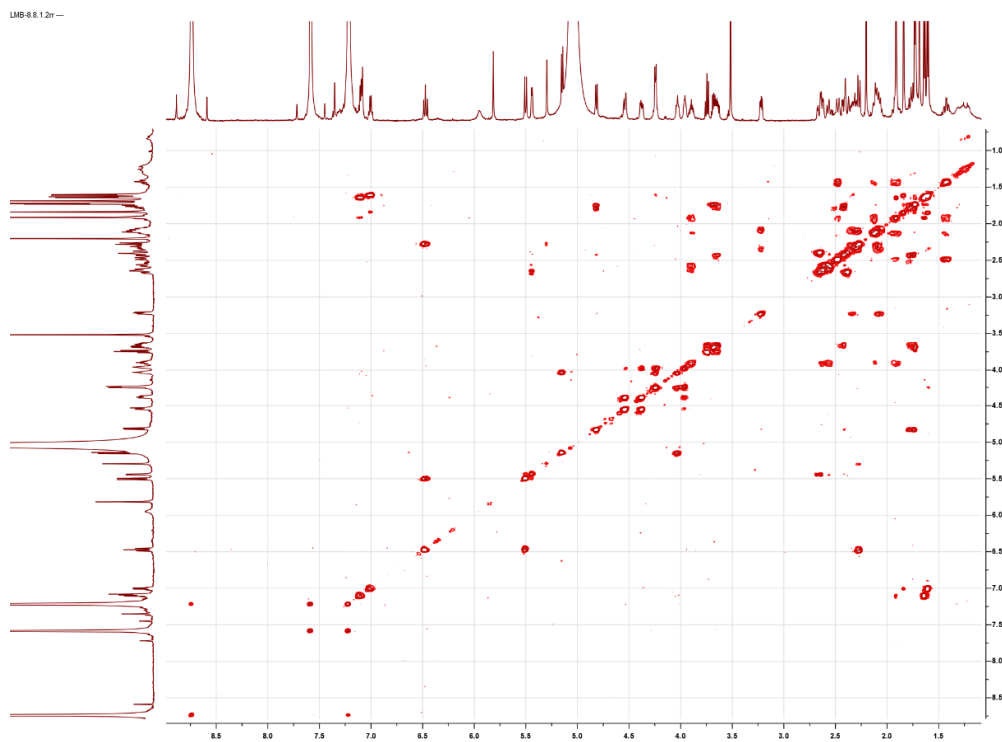

**Figure S12.**  $^1\text{H}$ - $^1\text{H}$  COSY (600/150 MHz, Pyridine- $d_5$ ) spectrum of Marsdeoside B (2).

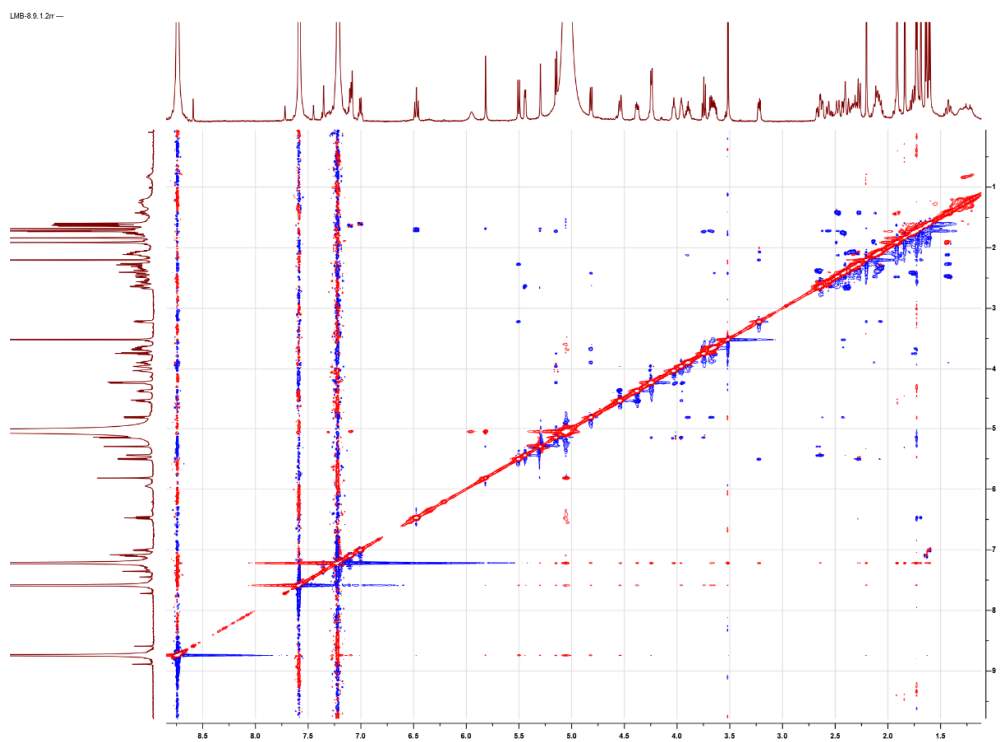

**Figure S13.** NOESY (600/150 MHz, Pyridine- $d_5$ ) spectrum of Marsdeoside B (2).

LMB08 #13 RT: 0.17 AV: 1 NL: 1.38E7  
T: FTMS + p ESI Full ms [600.0000-1000.0000]

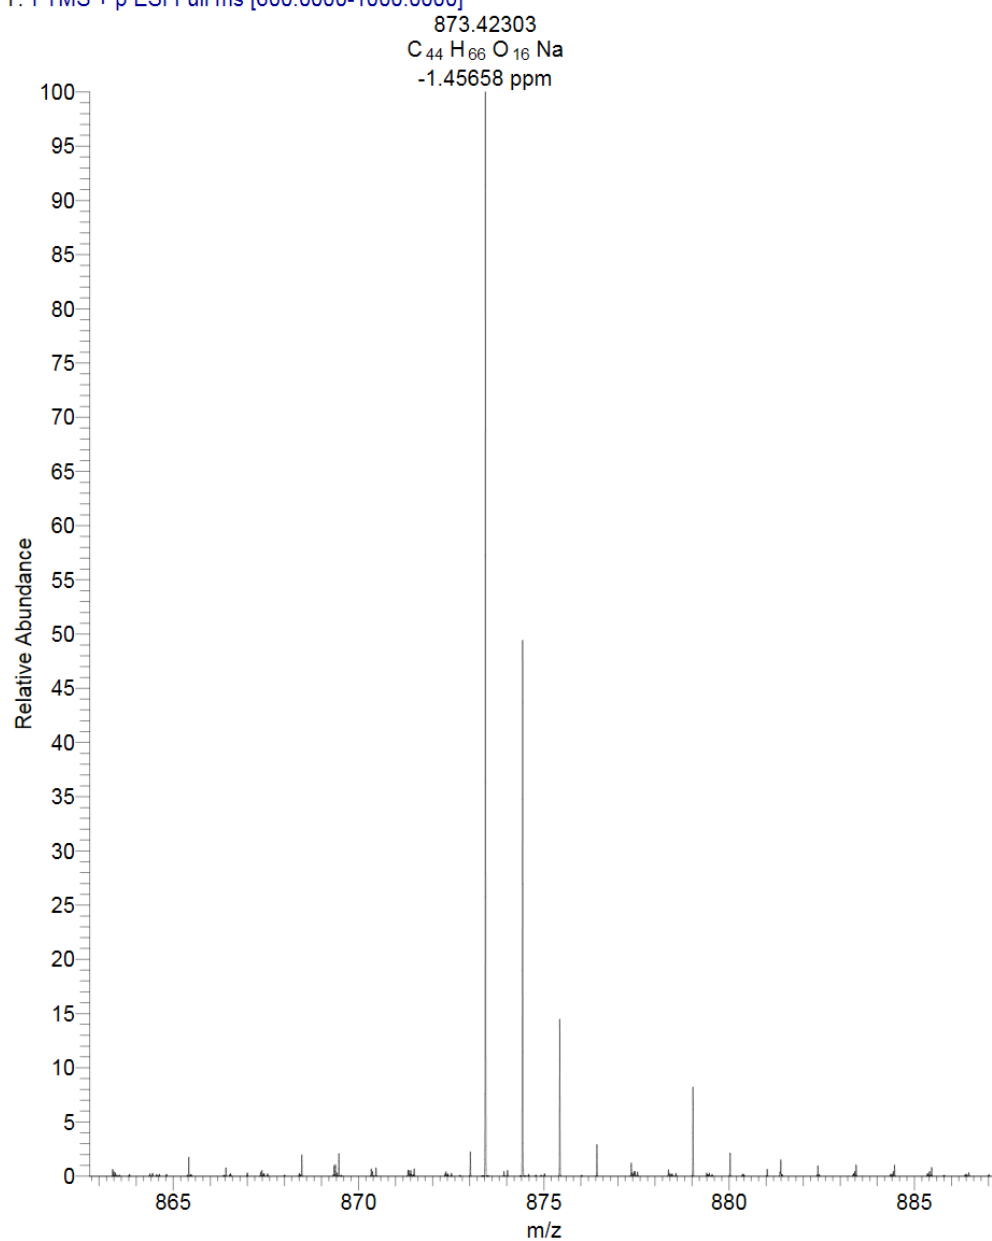

Figure S14. HRESIMS spectrum of Marsdeoside B (2).

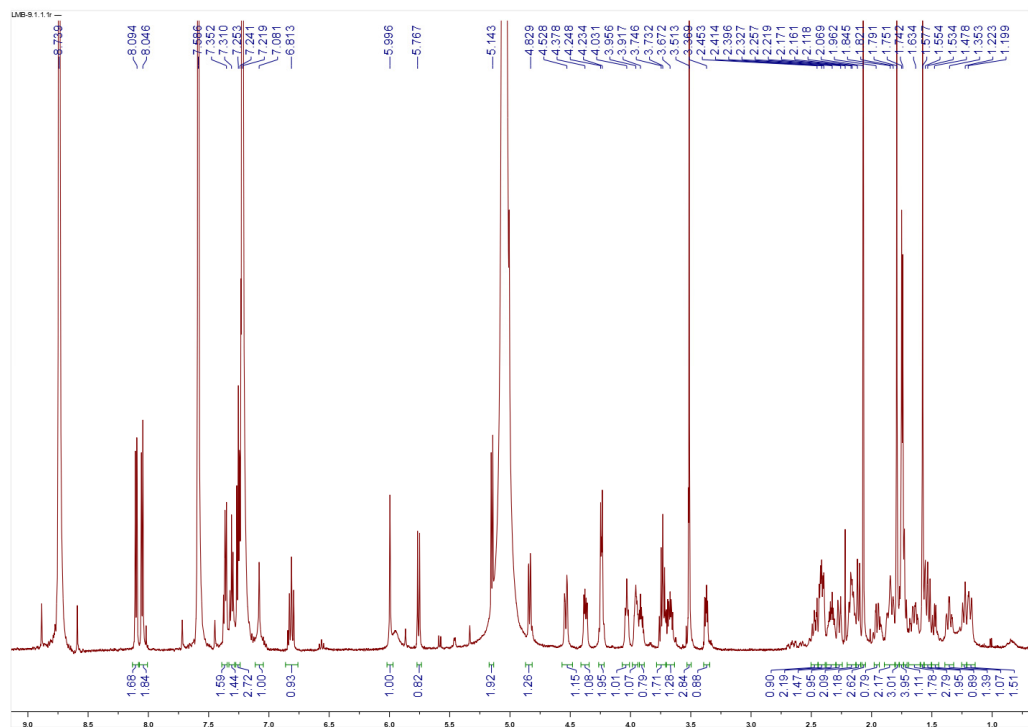

Figure S15. <sup>1</sup>H NMR (600 MHz, Pyridine-d<sub>5</sub>) spectrum of Marsdeoside C (3).

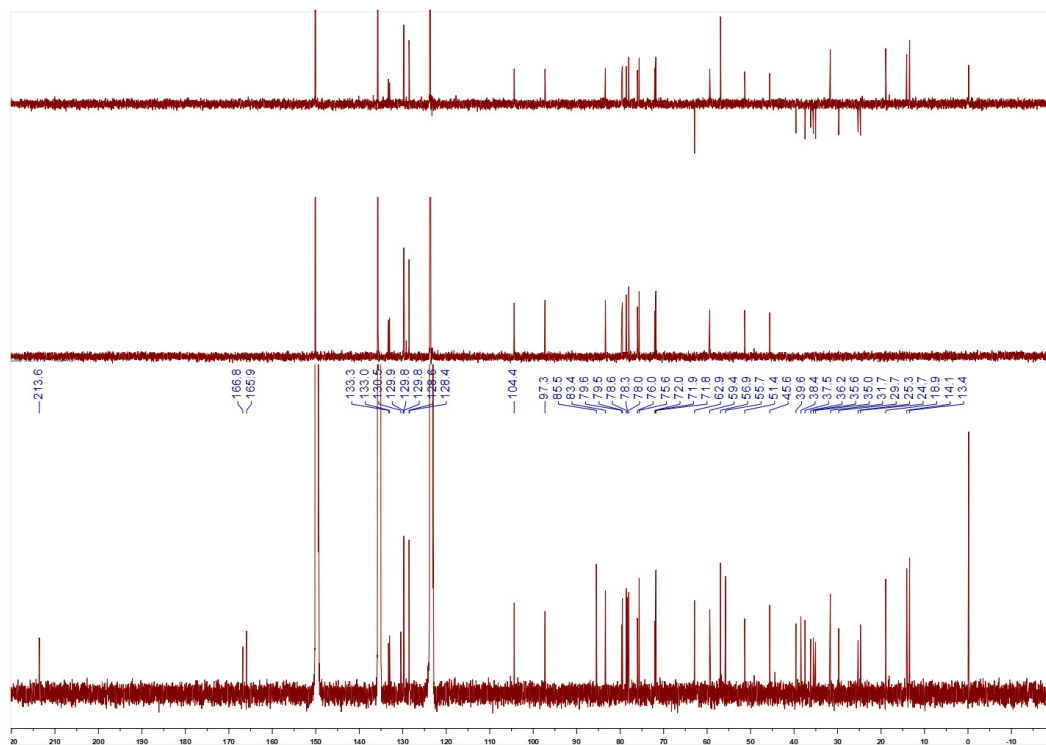

Figure S16. <sup>13</sup>C NMR (150 MHz, Pyridine-d<sub>5</sub>) spectrum of Marsdeoside C (3).

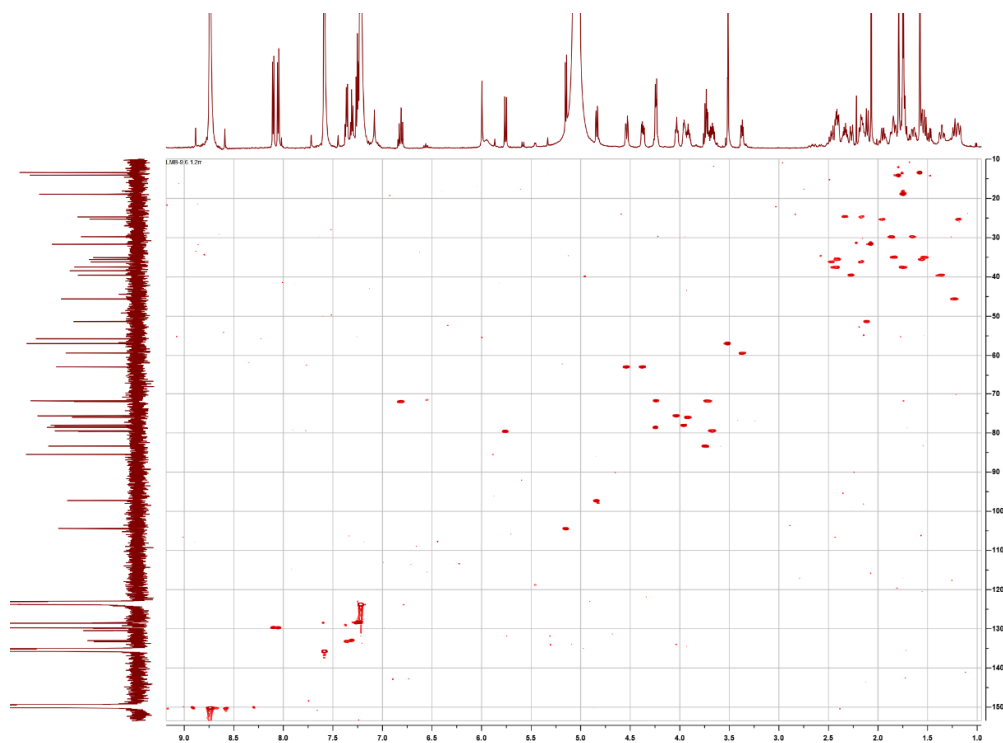

Figure S17. HSQC (600/150 MHz, Pyridine-d<sub>5</sub>) spectrum of Marsdeoside C (3).

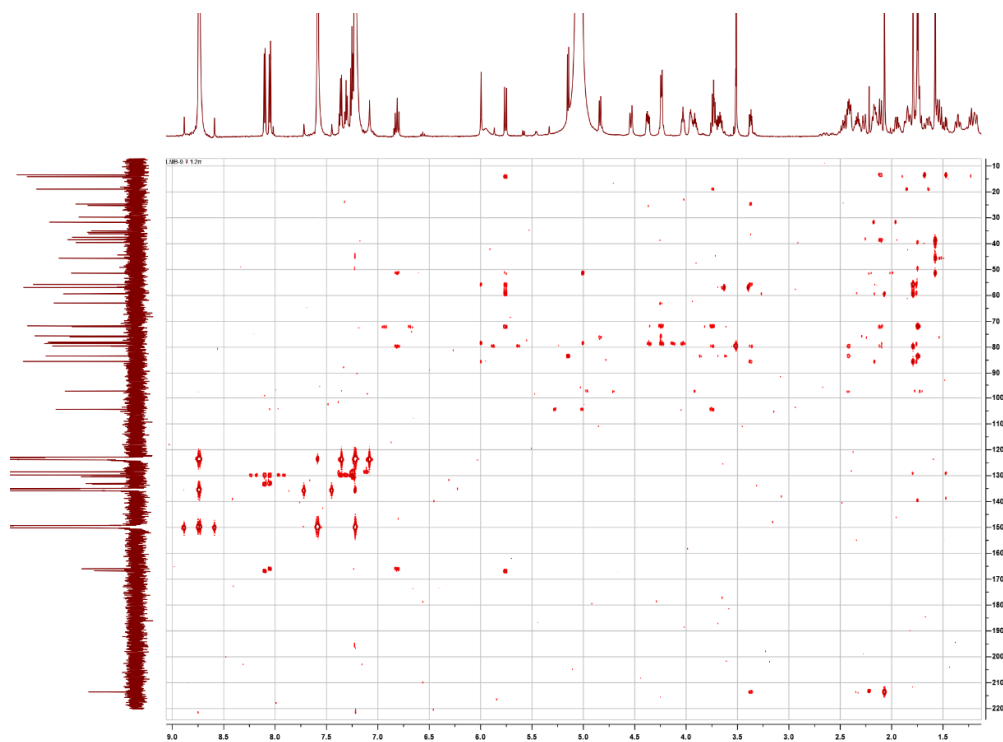

Figure S18. HMBC (600/150 MHz, Pyridine-d<sub>5</sub>) spectrum of Marsdeoside C (3).



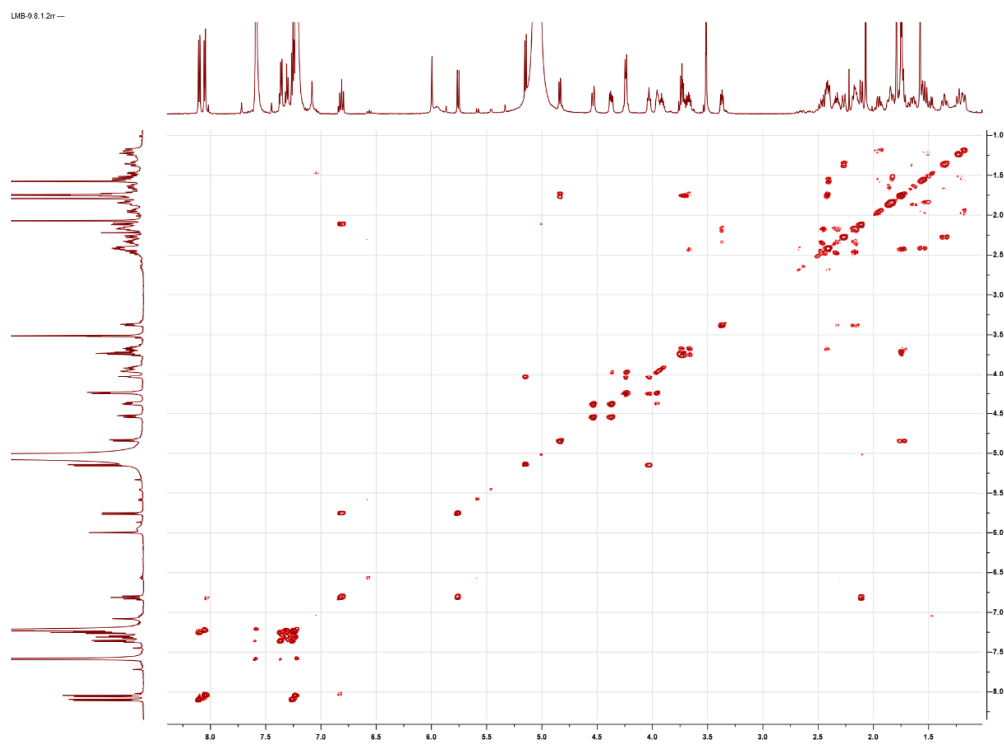

**Figure S19.**  $^1\text{H}$ - $^1\text{H}$  COSY (600/150 MHz, Pyridine- $d_5$ ) spectrum of Marsdeoside C (**3**).

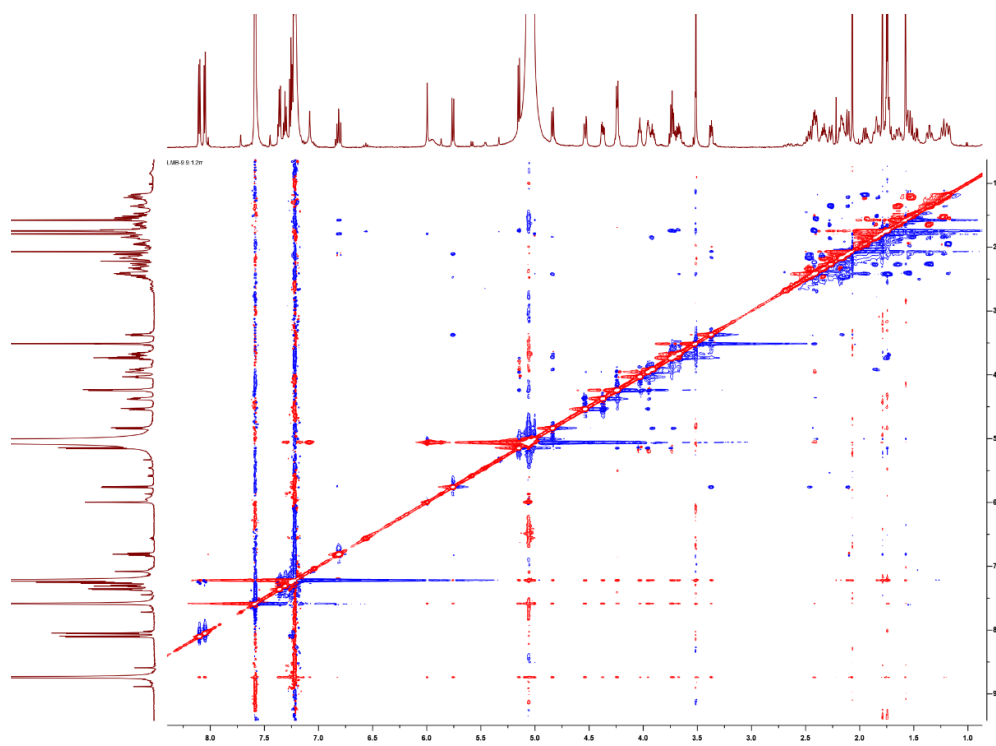

**Figure S20.** NOESY (600/150 MHz, Pyridine- $d_5$ ) spectrum of Marsdeoside C (**3**).

LMB09 #13 RT: 0.17 AV: 1 NL: 4.79E7  
T: FTMS + p ESI Full ms [600.0000-1000.0000]

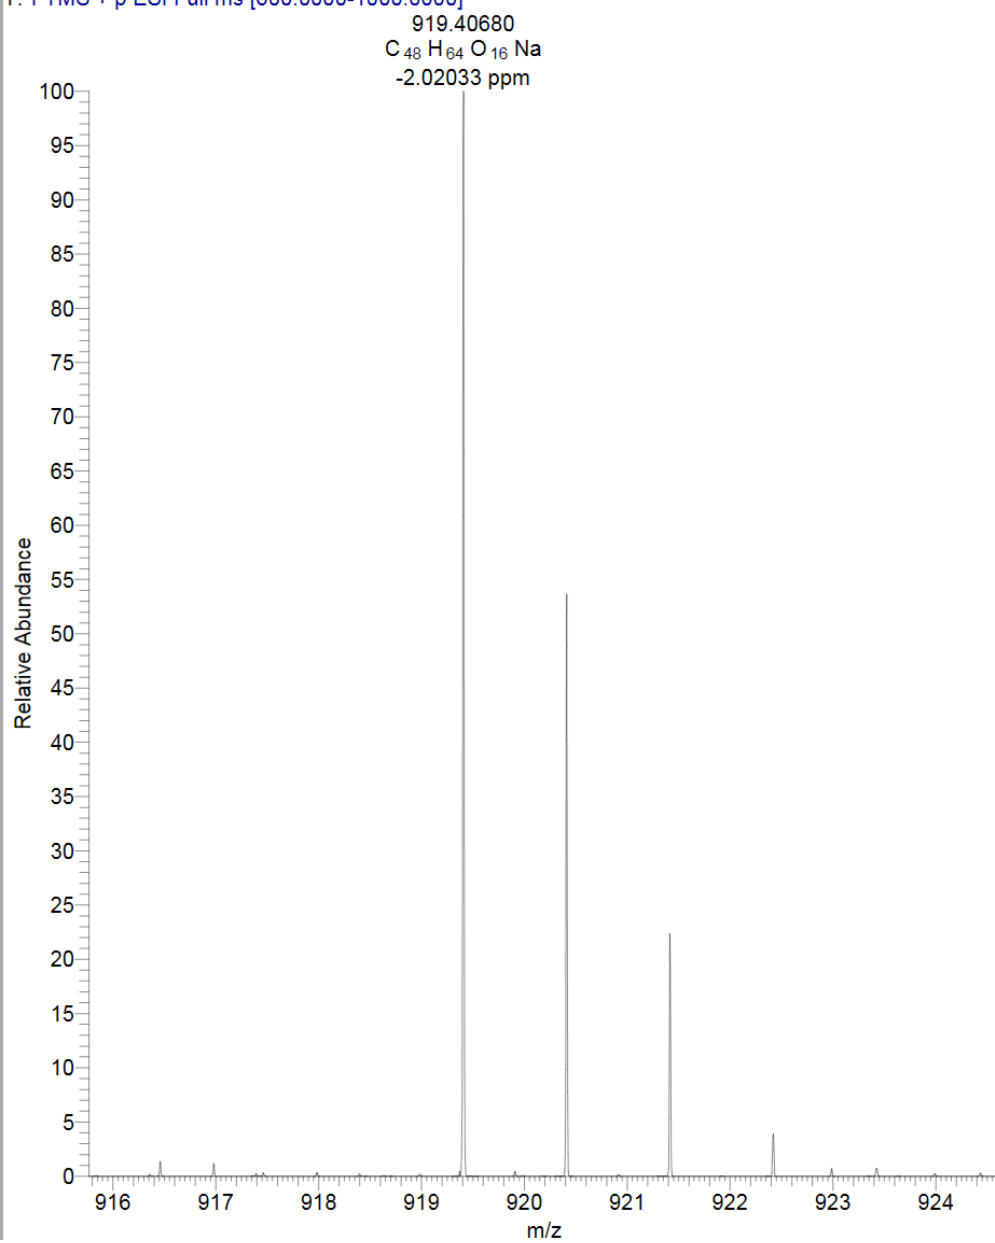

Figure S21. HRESIMS spectrum of Marsdeoside C (3).

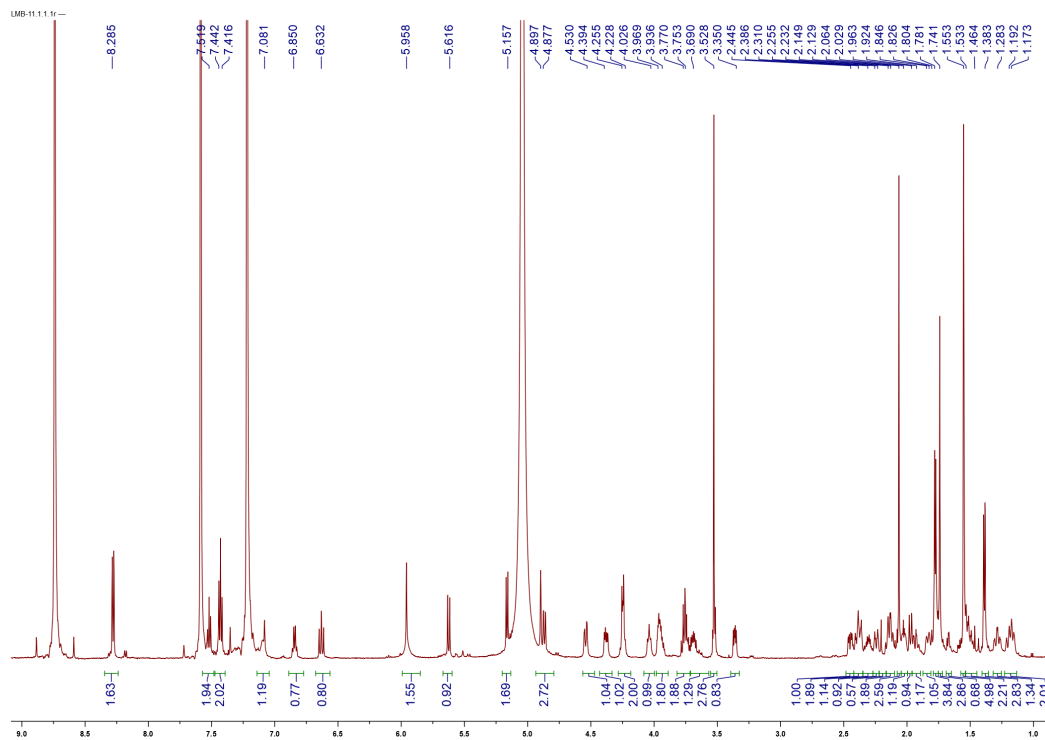

Figure S22. <sup>1</sup>H NMR (600 MHz, Pyridine-d<sub>5</sub>) spectrum of Marsdeoside D (4).

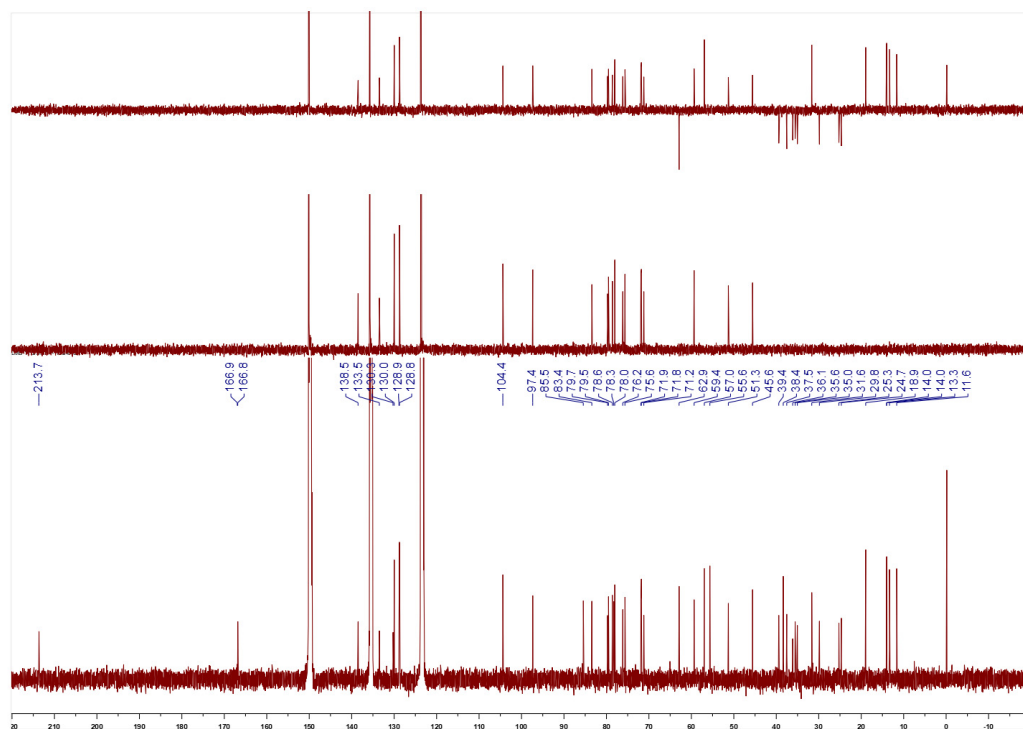

Figure S23. <sup>13</sup>C NMR (150 MHz, Pyridine-d<sub>5</sub>) spectrum of Marsdeoside D (4).

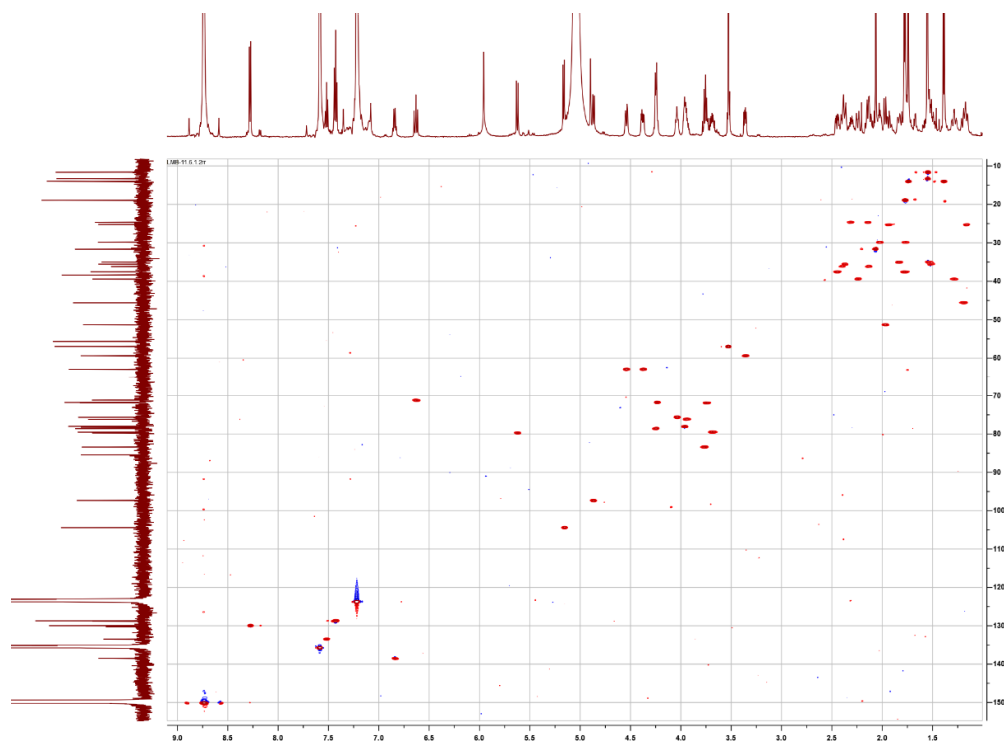

Figure S24. HSQC (600/150 MHz, Pyridine-d<sub>5</sub>) spectrum of Marsdeoside D (4).

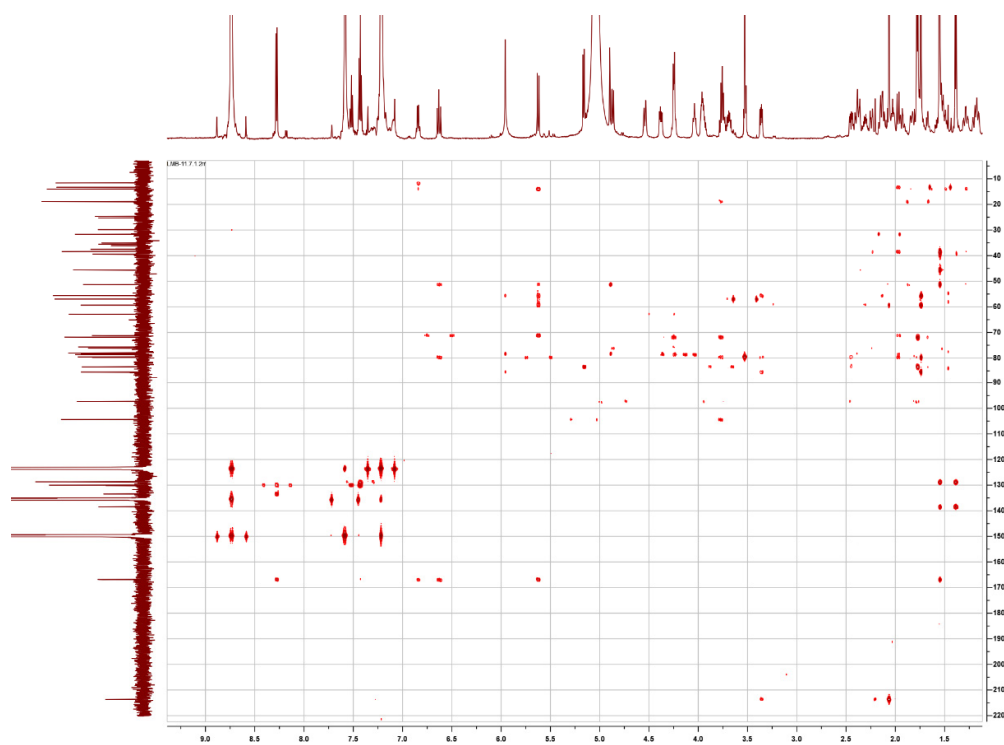

Figure S25. HMBC (600/150 MHz, Pyridine-d<sub>5</sub>) spectrum of Marsdeoside D (4).

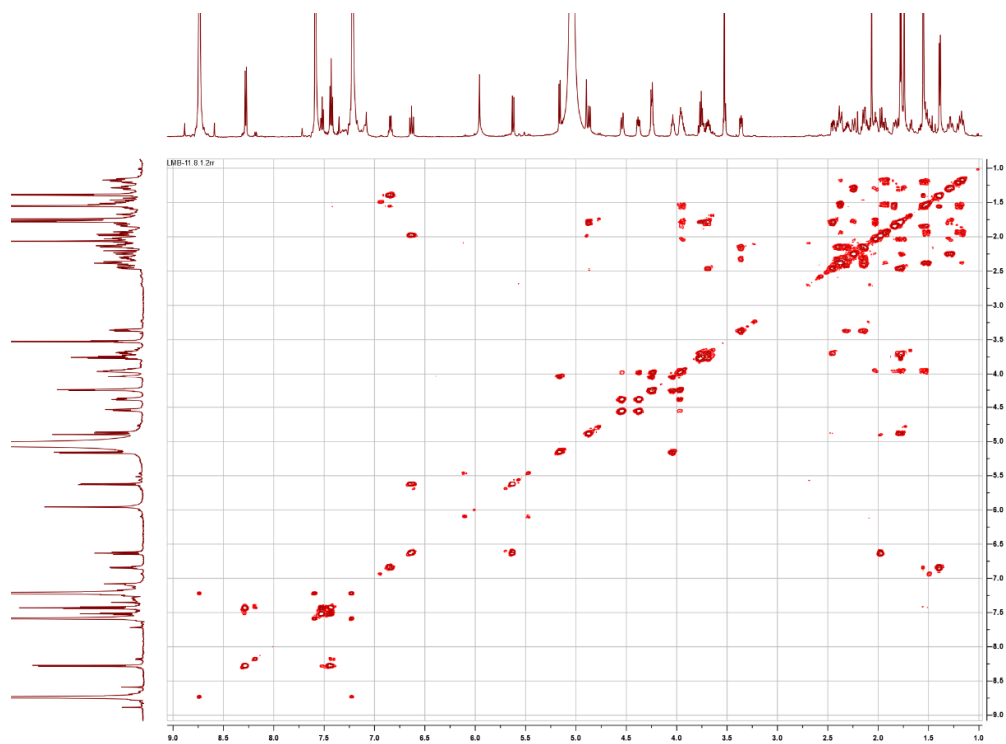

**Figure S26.**  $^1\text{H}$ - $^1\text{H}$  COSY (600/150 MHz, Pyridine- $d_5$ ) spectrum of Marsdeoside D (4).

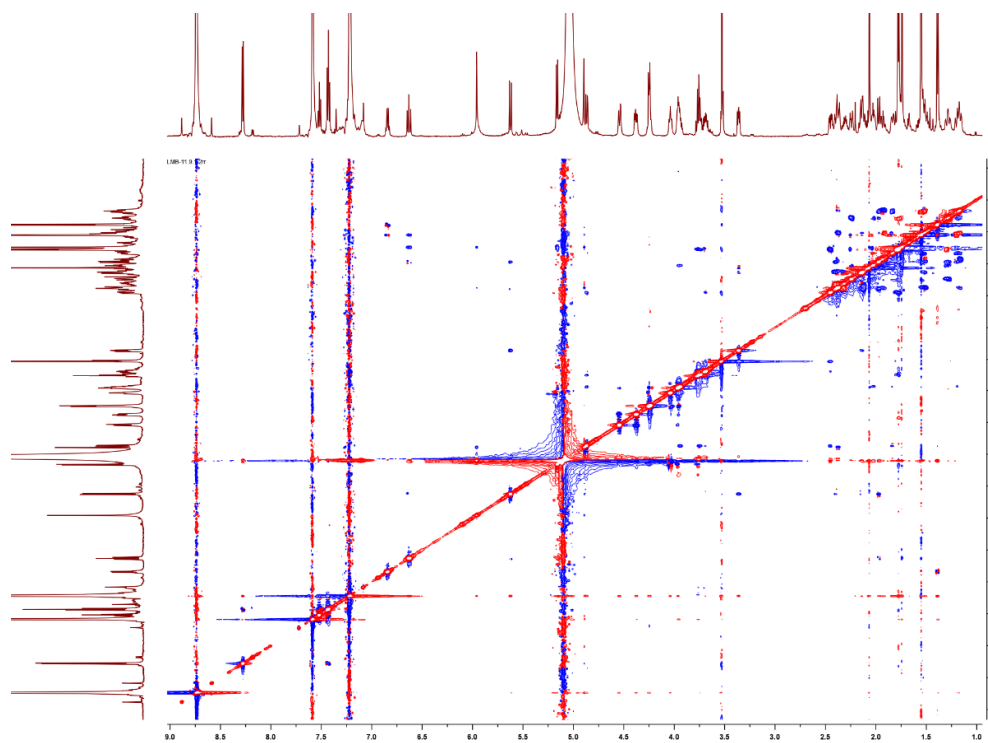

**Figure S27.**  $^1\text{H}$ - $^1\text{H}$  COSY (600/150 MHz, Pyridine- $d_5$ ) spectrum of Marsdeoside D (4).

LMB11 #13 RT: 0.17 AV: 1 NL: 2.93E7

T: FTMS + p ESI Full ms [600.0000-1000.0000]

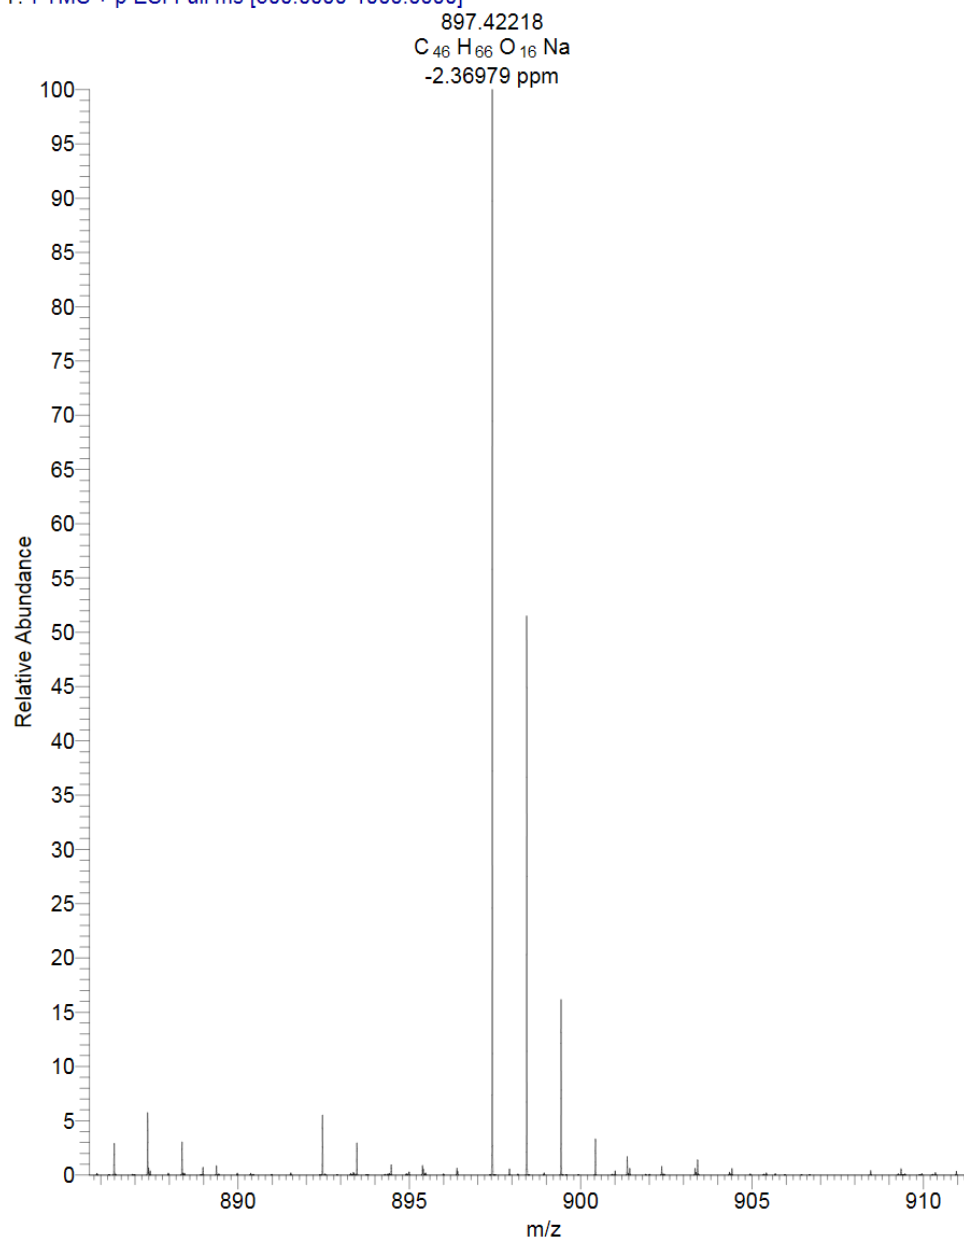

Figure S28. HRESIMS spectrum of Marsdeoside D (4).

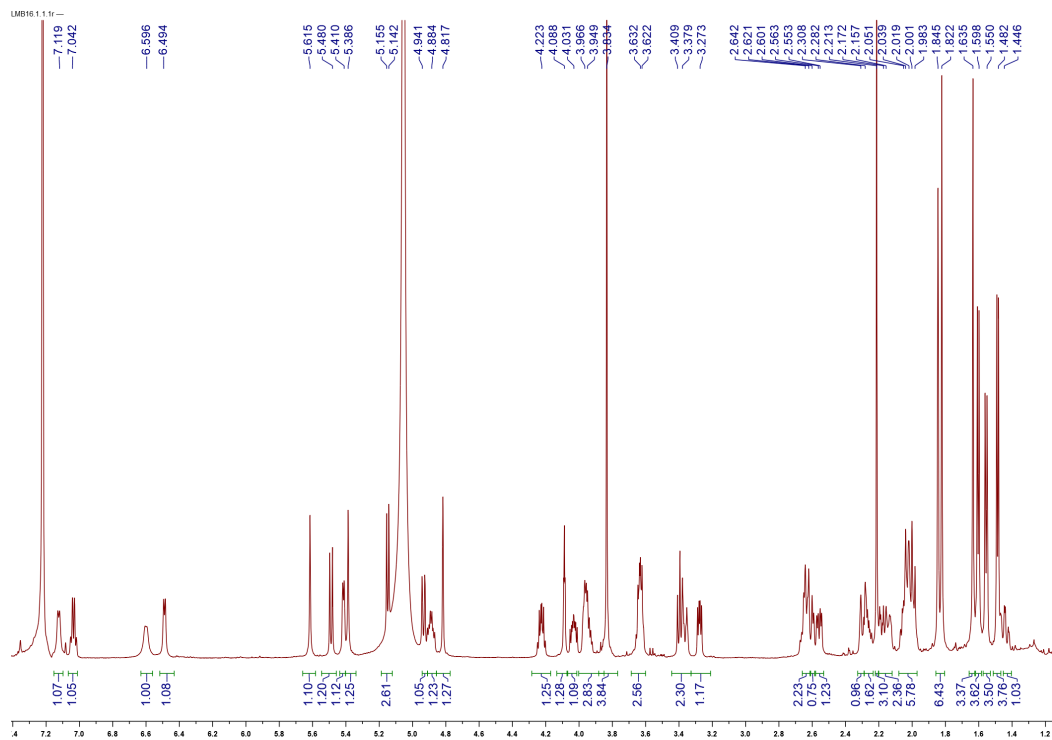

Figure S29. <sup>1</sup>H NMR (600 MHz, Pyridine-d<sub>5</sub>) spectrum of Marsdeoside E (5).

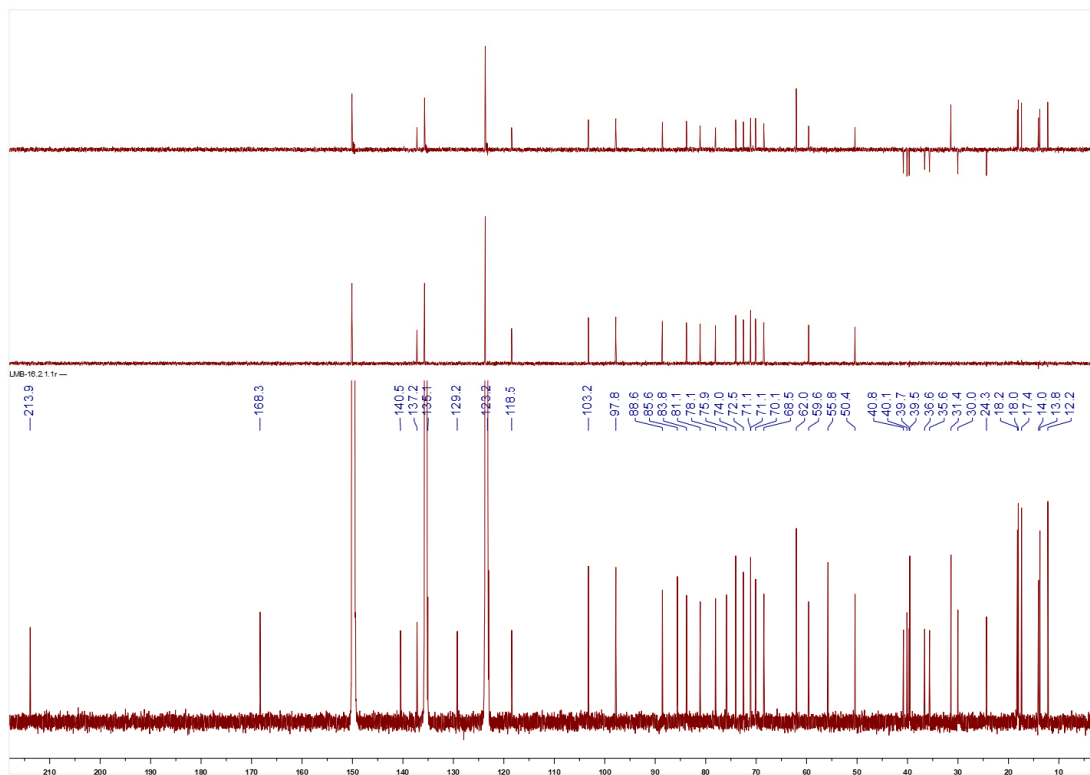

Figure S30. <sup>13</sup>C NMR (150 MHz, Pyridine-d<sub>5</sub>) spectrum of Marsdeoside E (5).

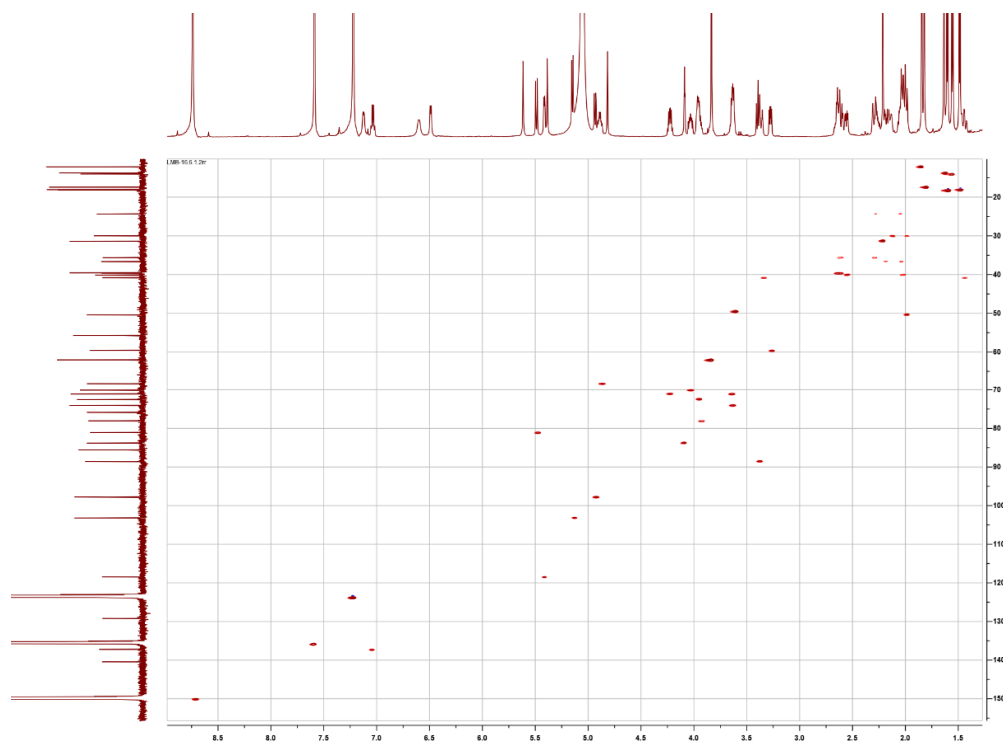

**Figure S31.** HSQC (600/150 MHz, Pyridine-d<sub>5</sub>) spectrum of Marsdeoside E (5).

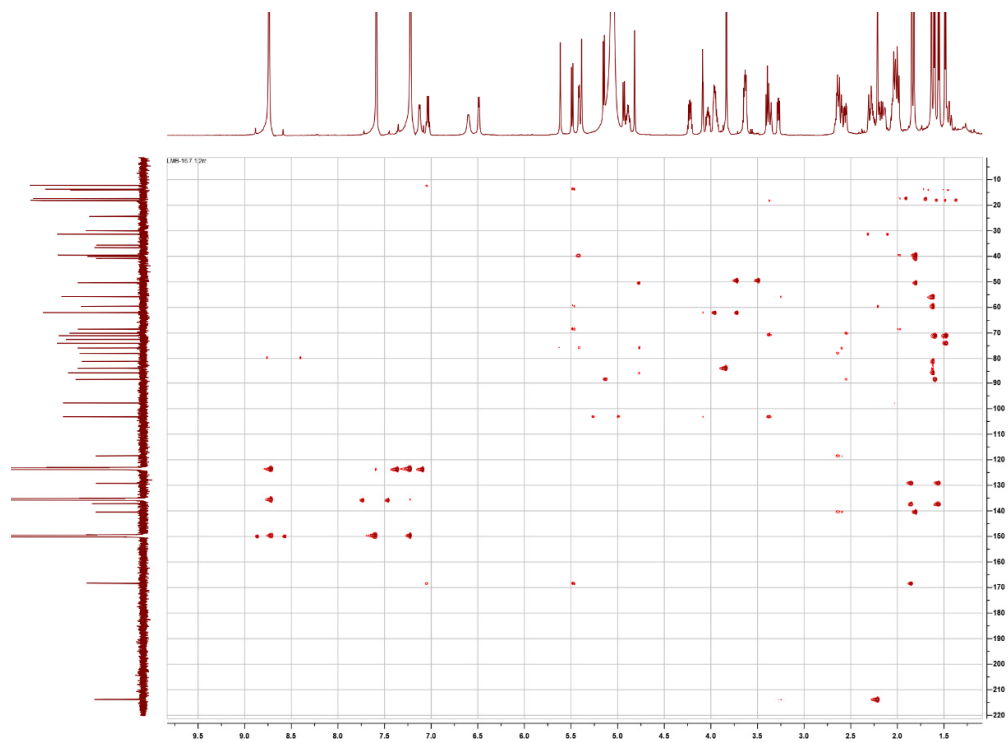

**Figure S32.** HMBC (600/150 MHz, Pyridine-d<sub>5</sub>) spectrum of Marsdeoside E (5).



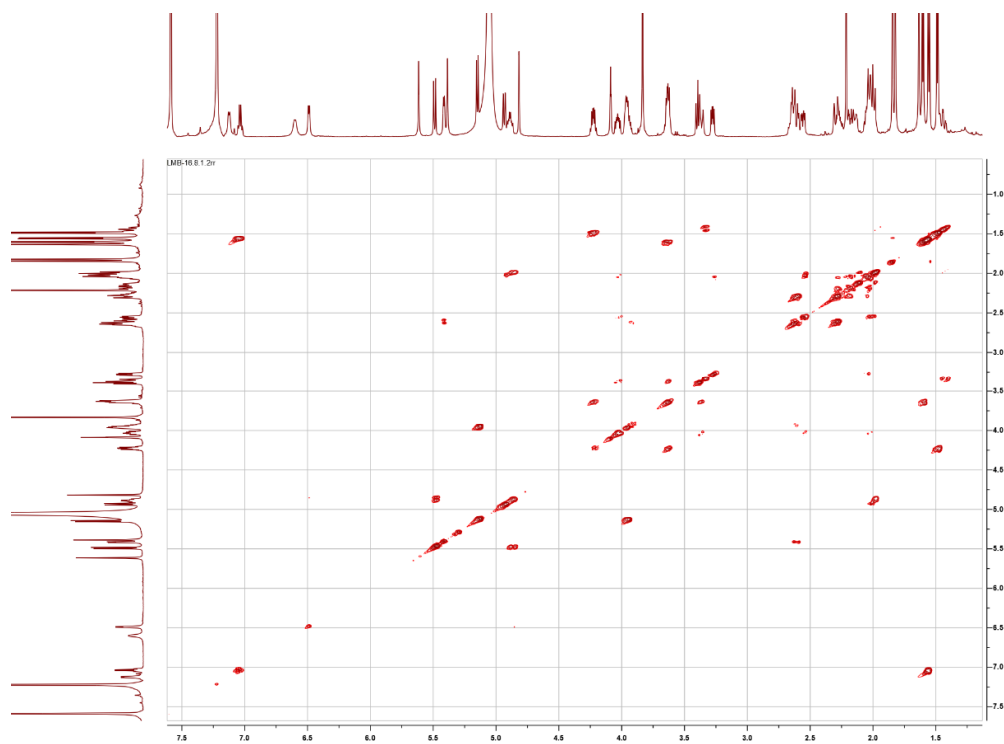

**Figure S33.**  $^1\text{H}$ - $^1\text{H}$  COSY (600/150 MHz, Pyridine- $d_5$ ) spectrum of Marsdeoside E (5).

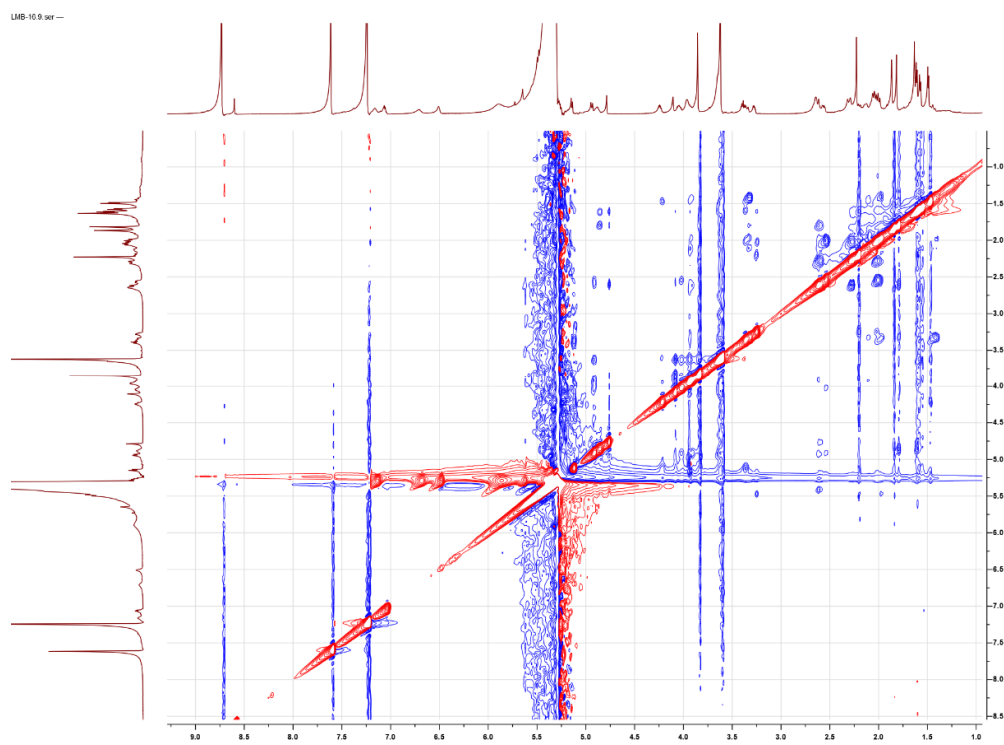

**Figure S34.** NOESY (600/150 MHz, Pyridine- $d_5$ ) spectrum of Marsdeoside E (5).

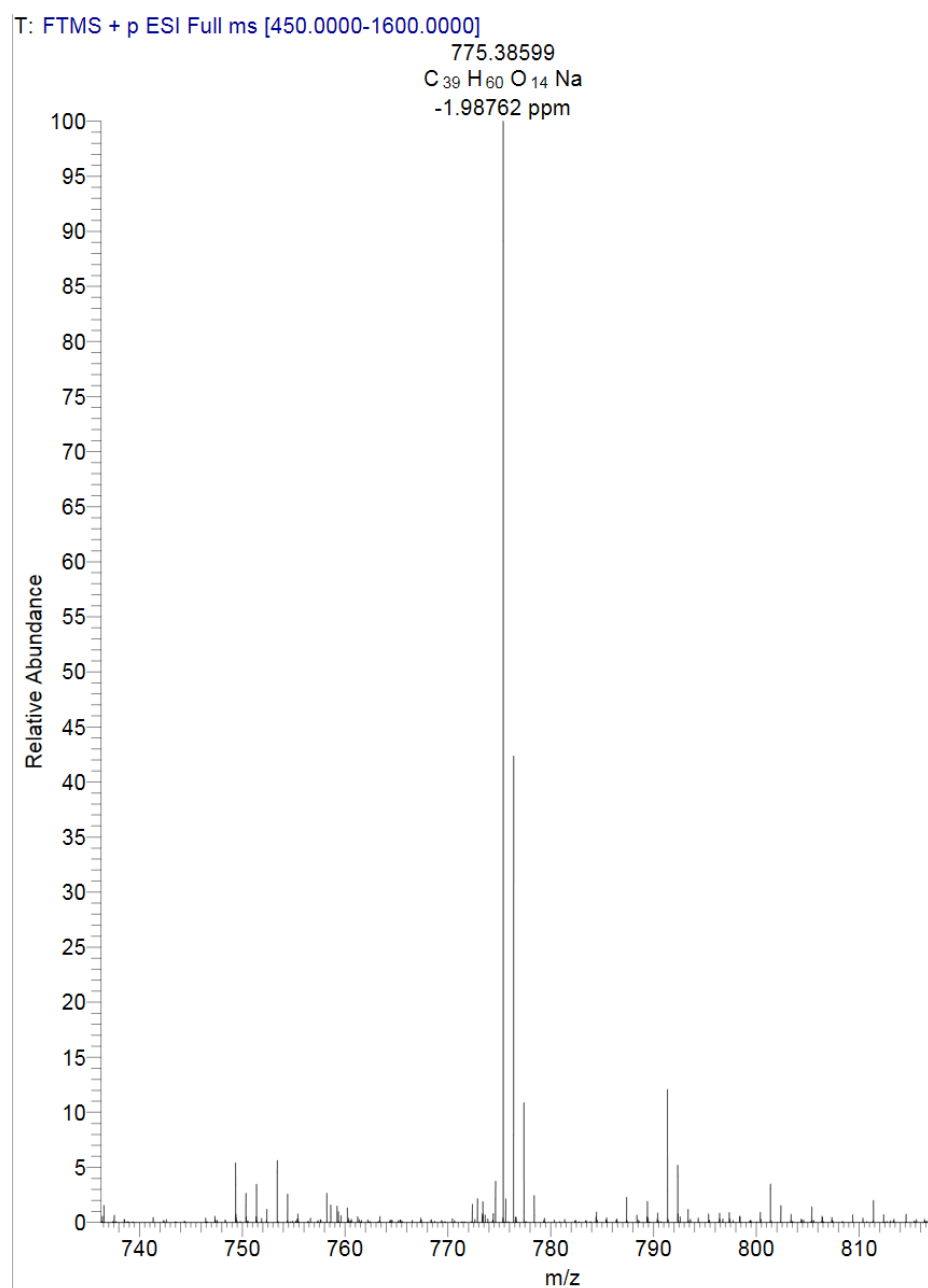

Figure S35. HRESIMS spectrum of Marsdeoside E (5).

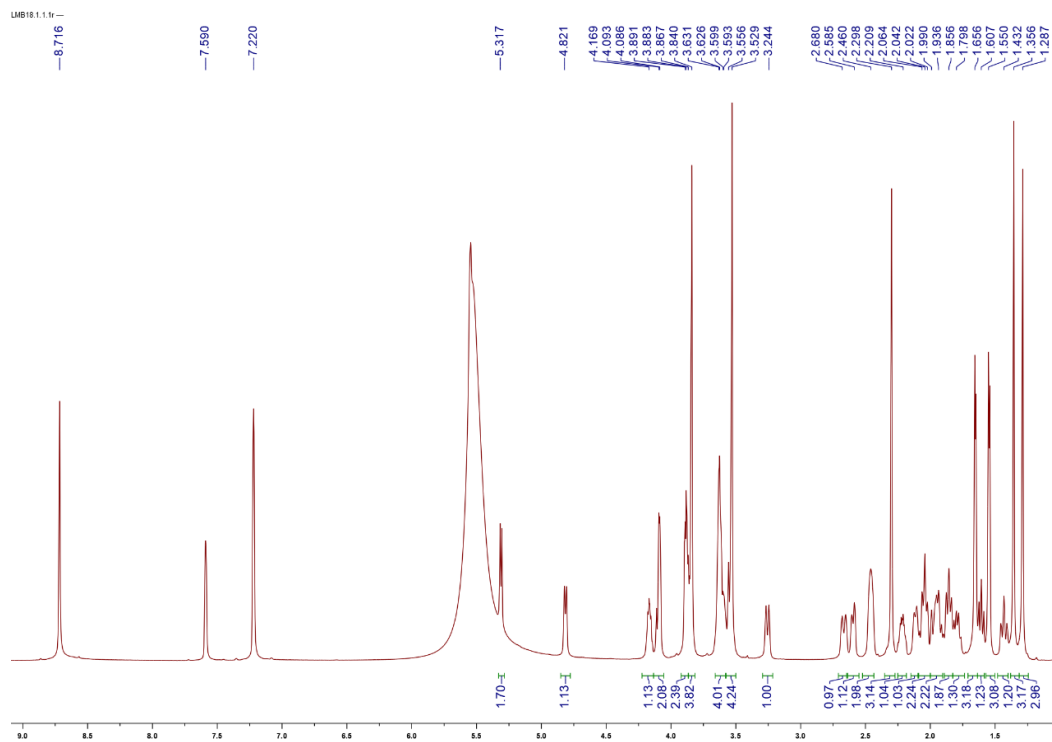

Figure S36.  $^1\text{H}$  NMR (600 MHz, Pyridine- $d_5$ ) spectrum of Marsdeoside F (6).

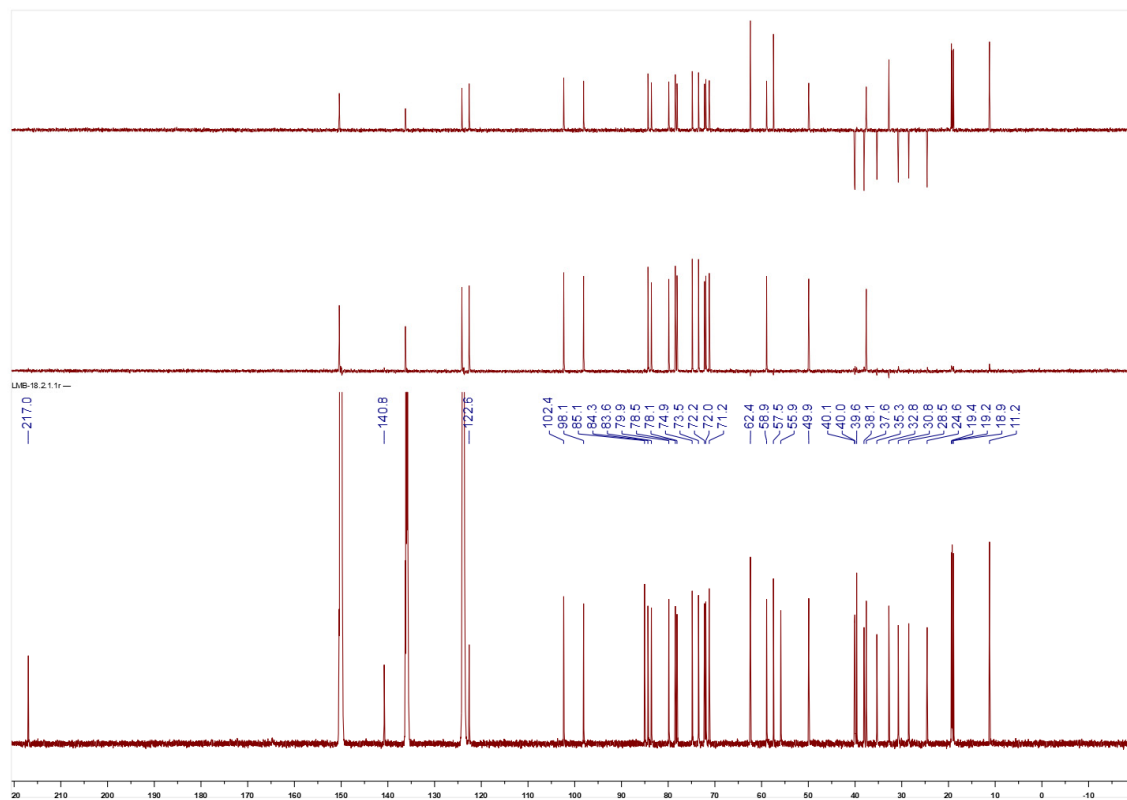

Figure S37.  $^{13}\text{C}$  NMR (150 MHz, Pyridine- $d_5$ ) spectrum of Marsdeoside F (6).

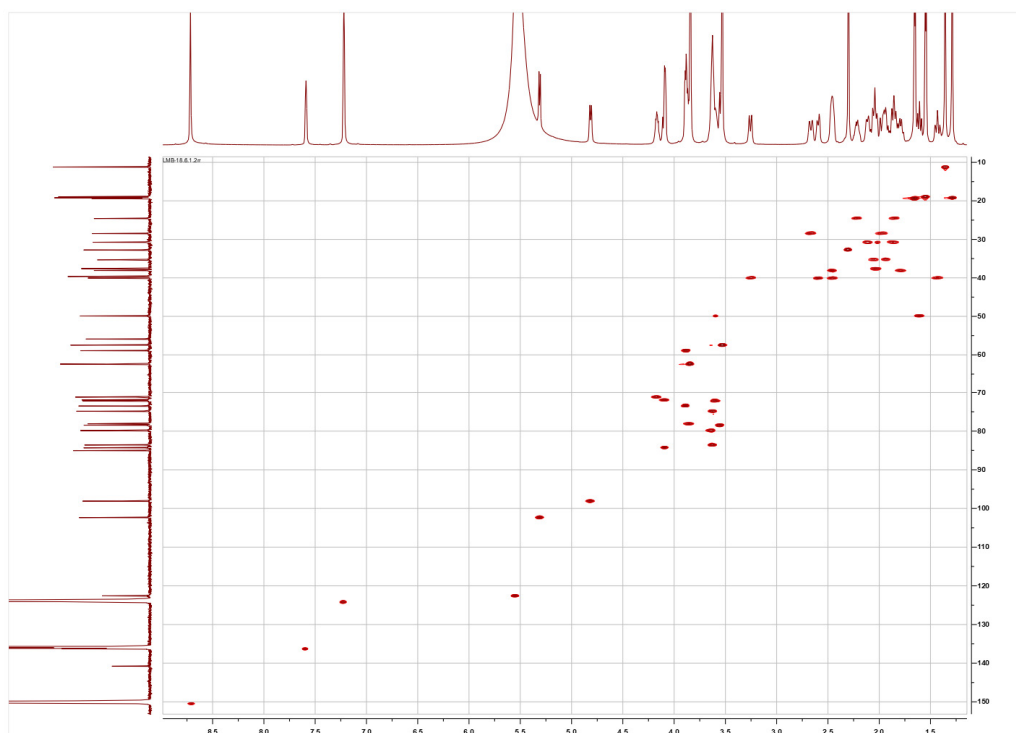

**Figure S38.** HSQC (600/150 MHz, Pyridine-*d*<sub>5</sub>) spectrum of Marsdeoside F (6).

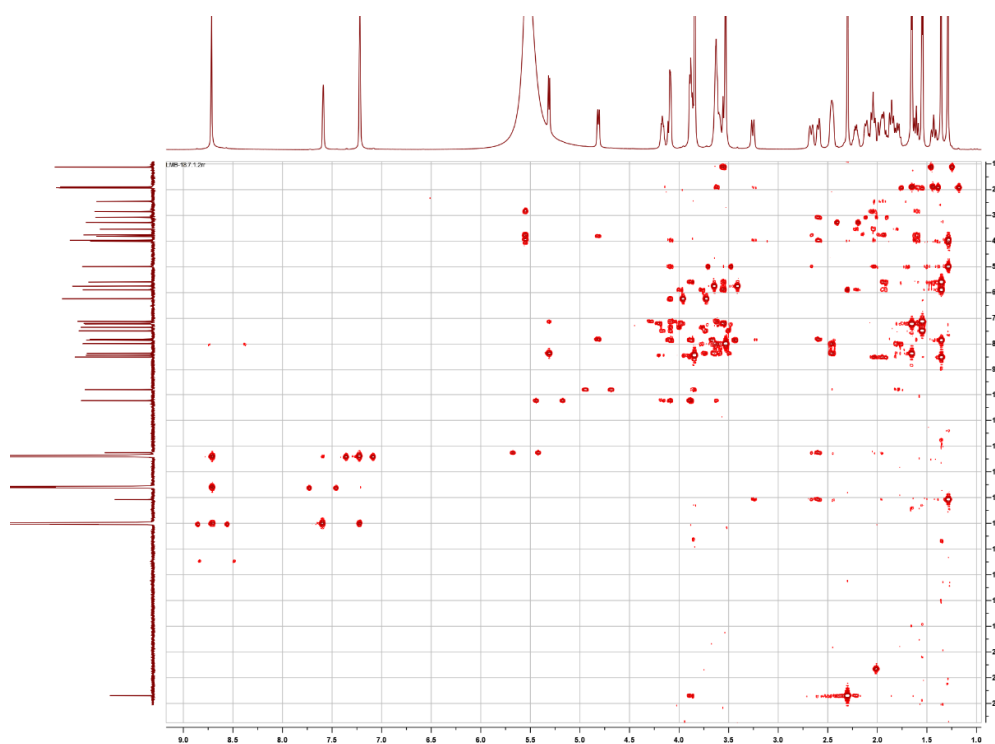

**Figure S39.** HMBC (600/150 MHz, Pyridine-*d*<sub>5</sub>) spectrum of Marsdeoside F (6).

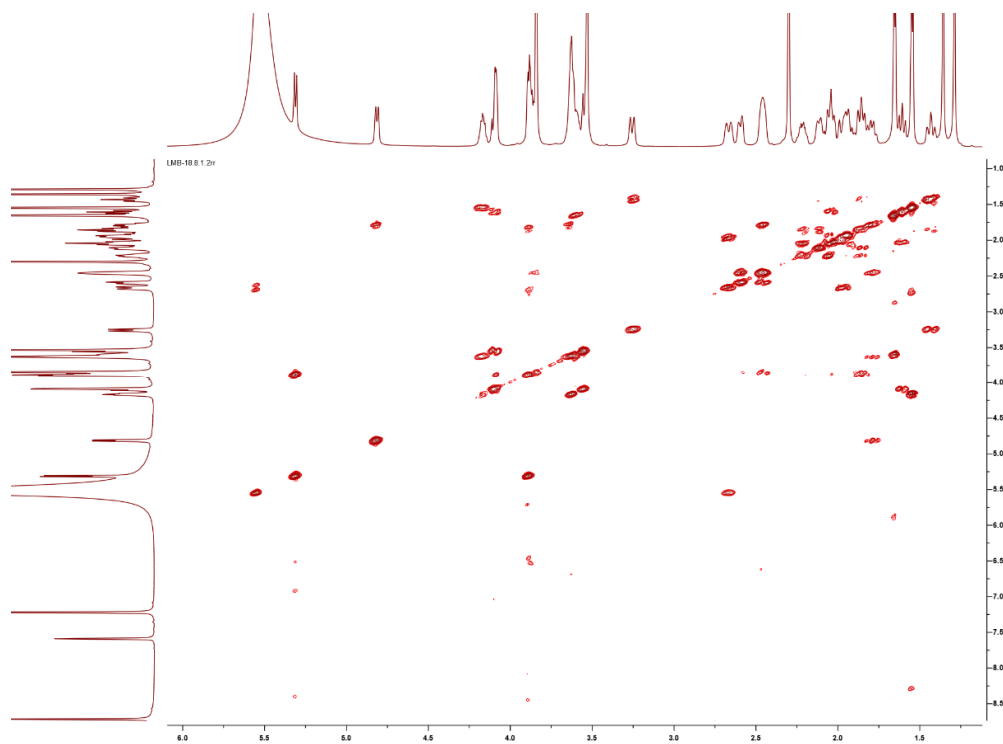

**Figure S40.**  $^1\text{H}$ - $^1\text{H}$  COSY (600/150 MHz, Pyridine- $d_5$ ) spectrum of Marsdeoside F (6).

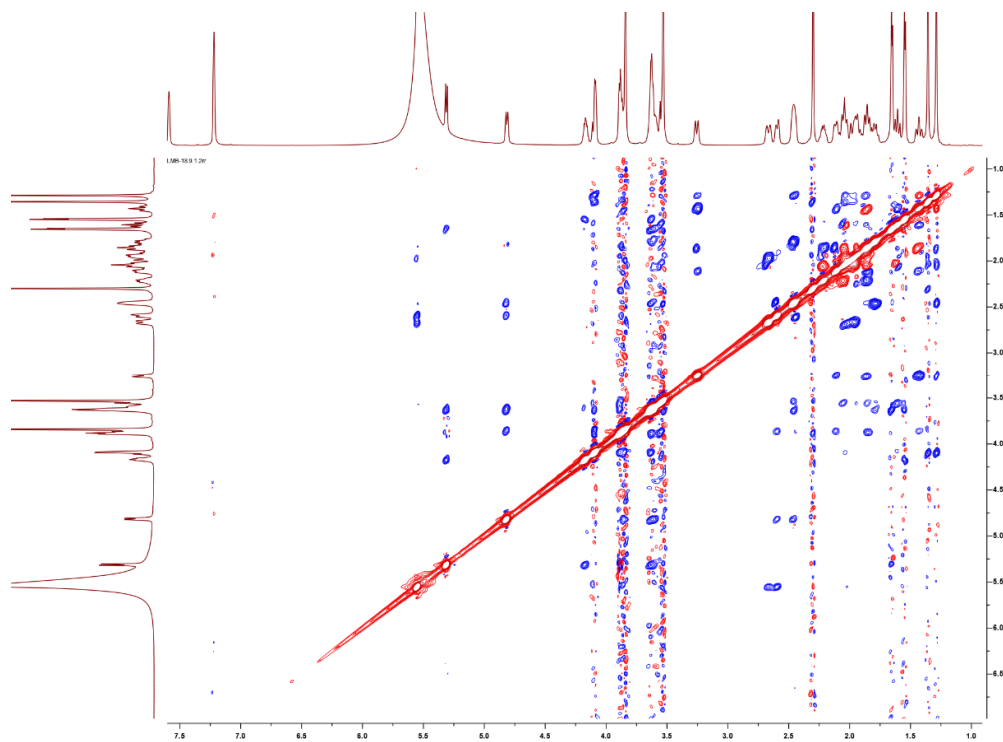

**Figure S41.** NOESY (600/150 MHz, Pyridine- $d_5$ ) spectrum of Marsdeoside F (6).

LMB18 #11 RT: 0.14 AV: 1 SB: 9 1.49-1.72 NL: 4.24E8  
T: FTMS + p ESI Full ms [400.0000-1000.0000]

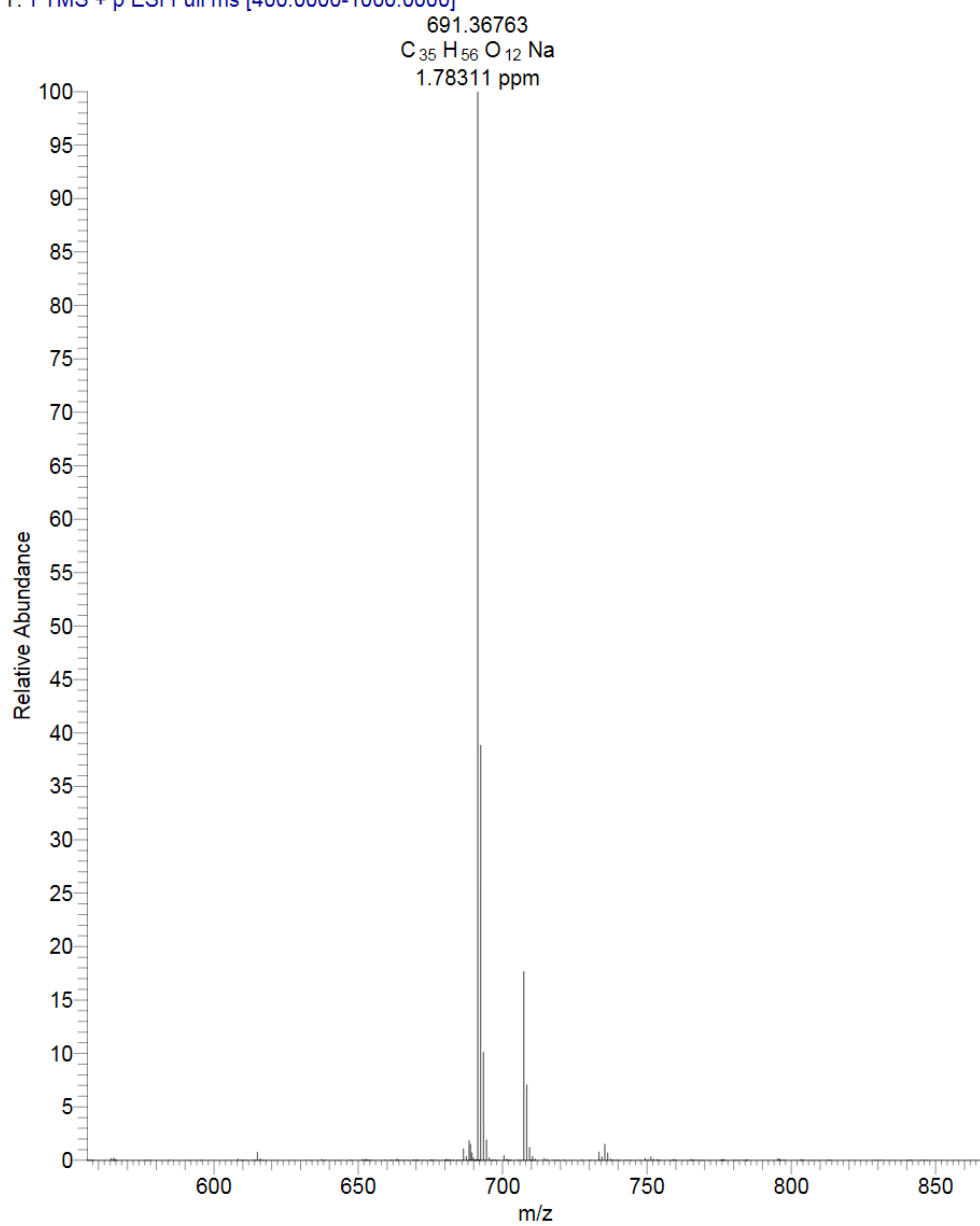

Figure S42. HRESIMS spectrum of Marsdeoside F (6).

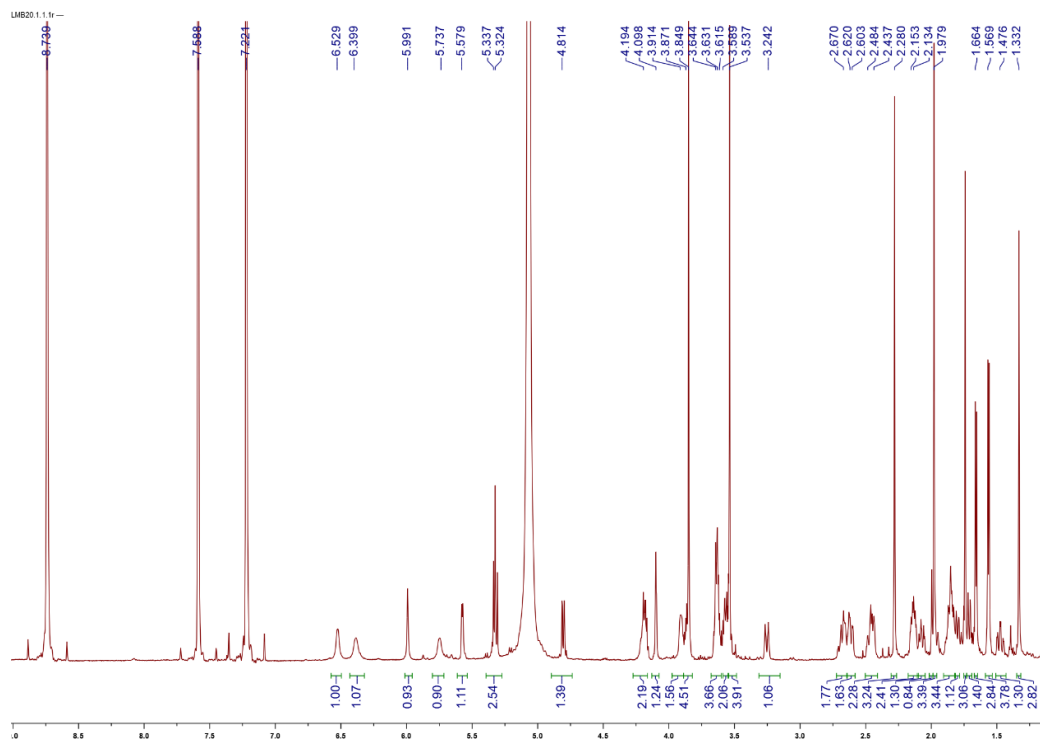

Figure S43. <sup>1</sup>H NMR (600 MHz, Pyridine-d<sub>5</sub>) spectrum of Marsdeoside G (7).

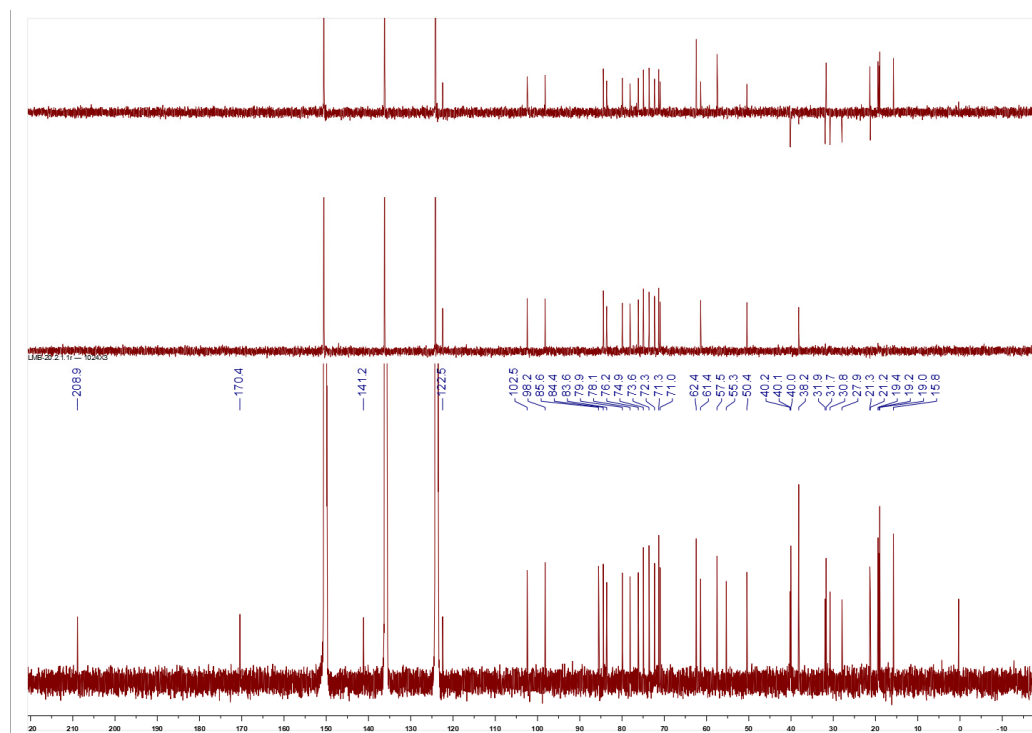

Figure S44. <sup>13</sup>C NMR (150 MHz, Pyridine-d<sub>5</sub>) spectrum of Marsdeoside G (7).

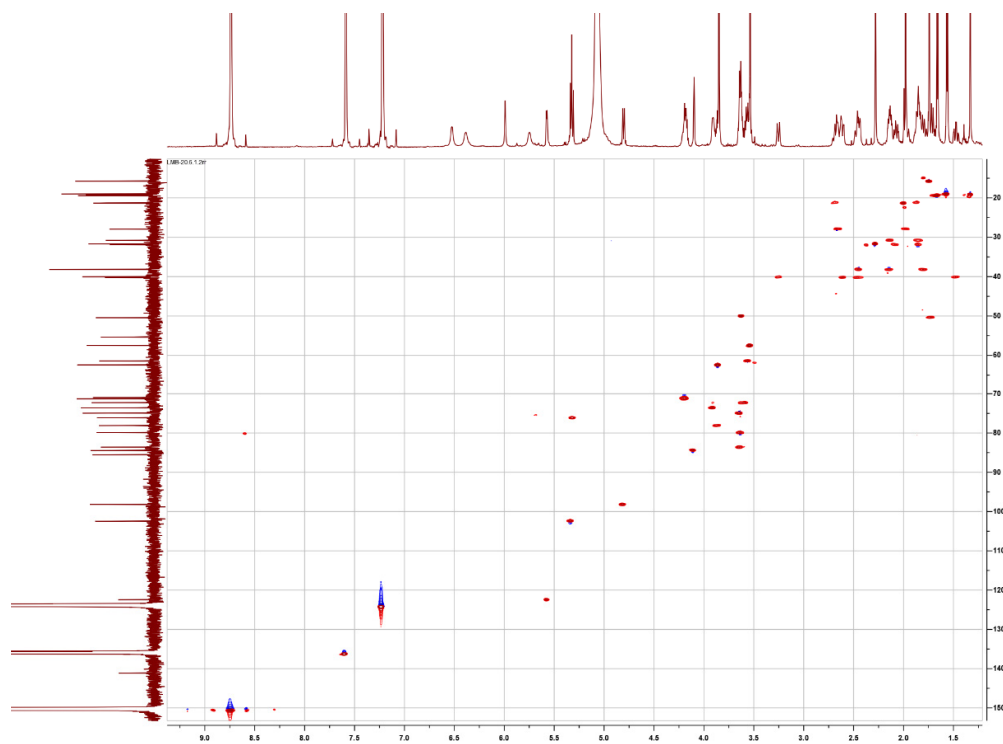

**Figure S45.** HSQC (600/150 MHz, Pyridine-d<sub>5</sub>) spectrum of Marsdeoside G (7).

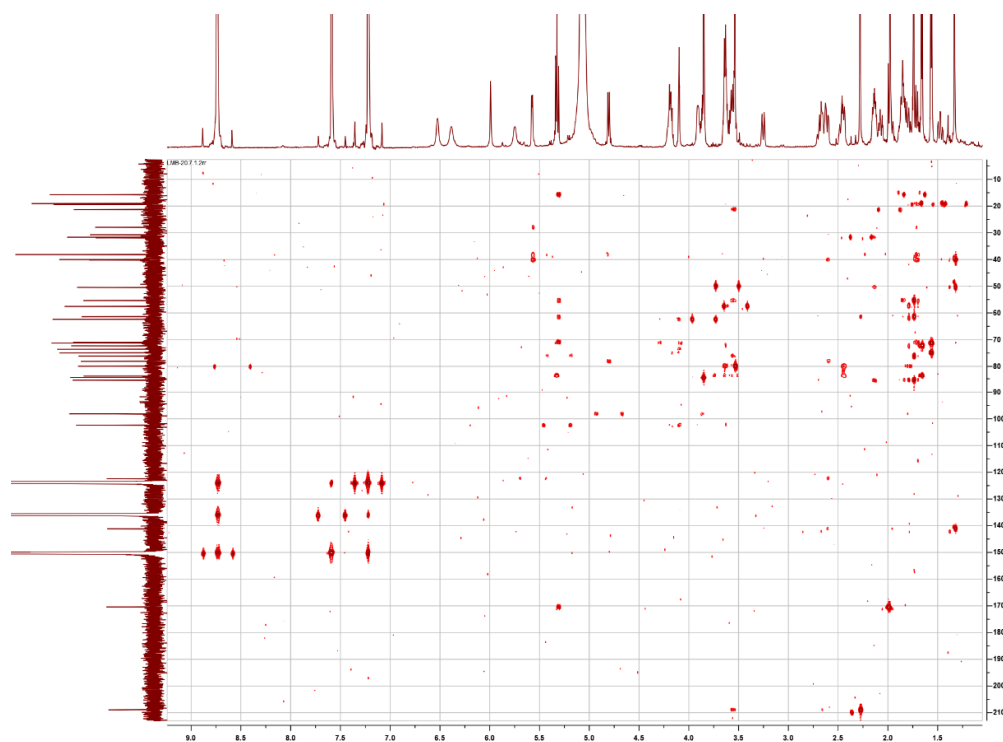

**Figure S46.** HMBC (600/150 MHz, Pyridine-d<sub>5</sub>) spectrum of Marsdeoside G (7).



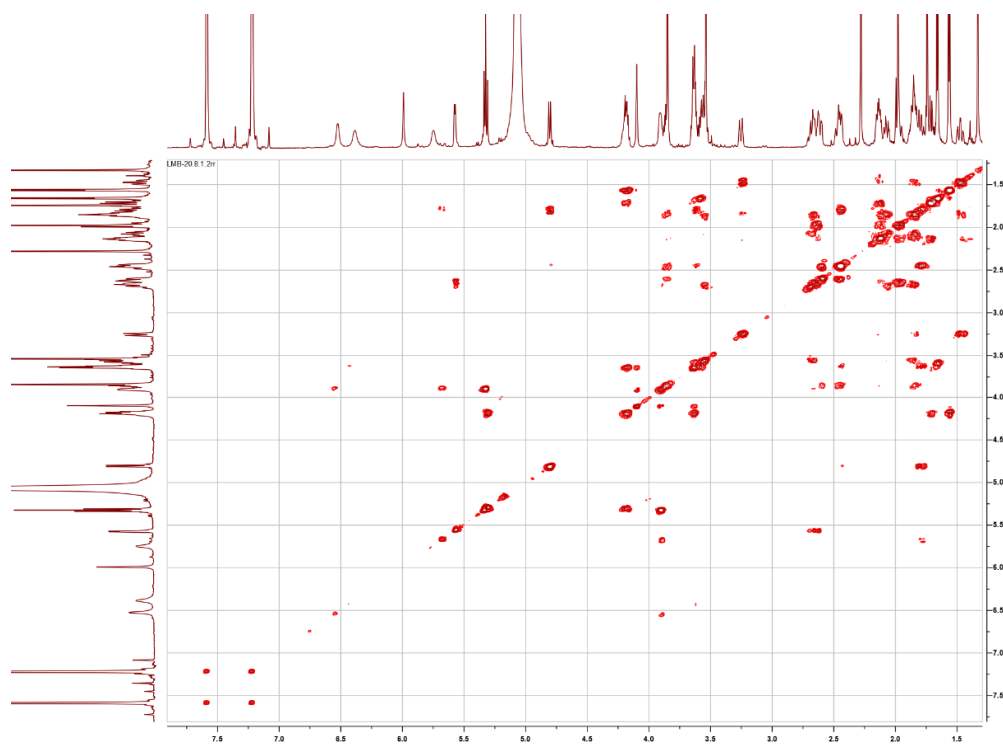

**Figure S47.**  $^1\text{H}$ - $^1\text{H}$  COSY (600/150 MHz, Pyridine- $d_5$ ) spectrum of Marsdeoside G (7).

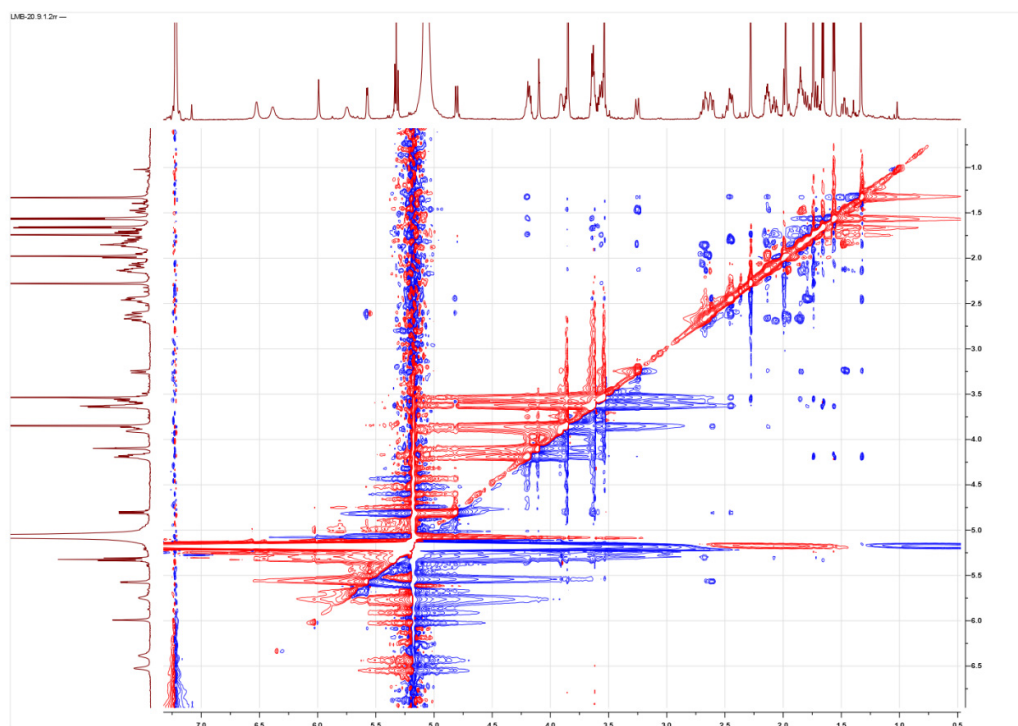

**Figure S48.** NOESY (600/150 MHz, Pyridine- $d_5$ ) spectrum of Marsdeoside G (7).

LMB20 #13 RT: 0.17 AV: 1 SB: 10 1.47-1.72 NL: 1.85E8  
T: FTMS + p ESI Full ms [450.0000-1600.0000]

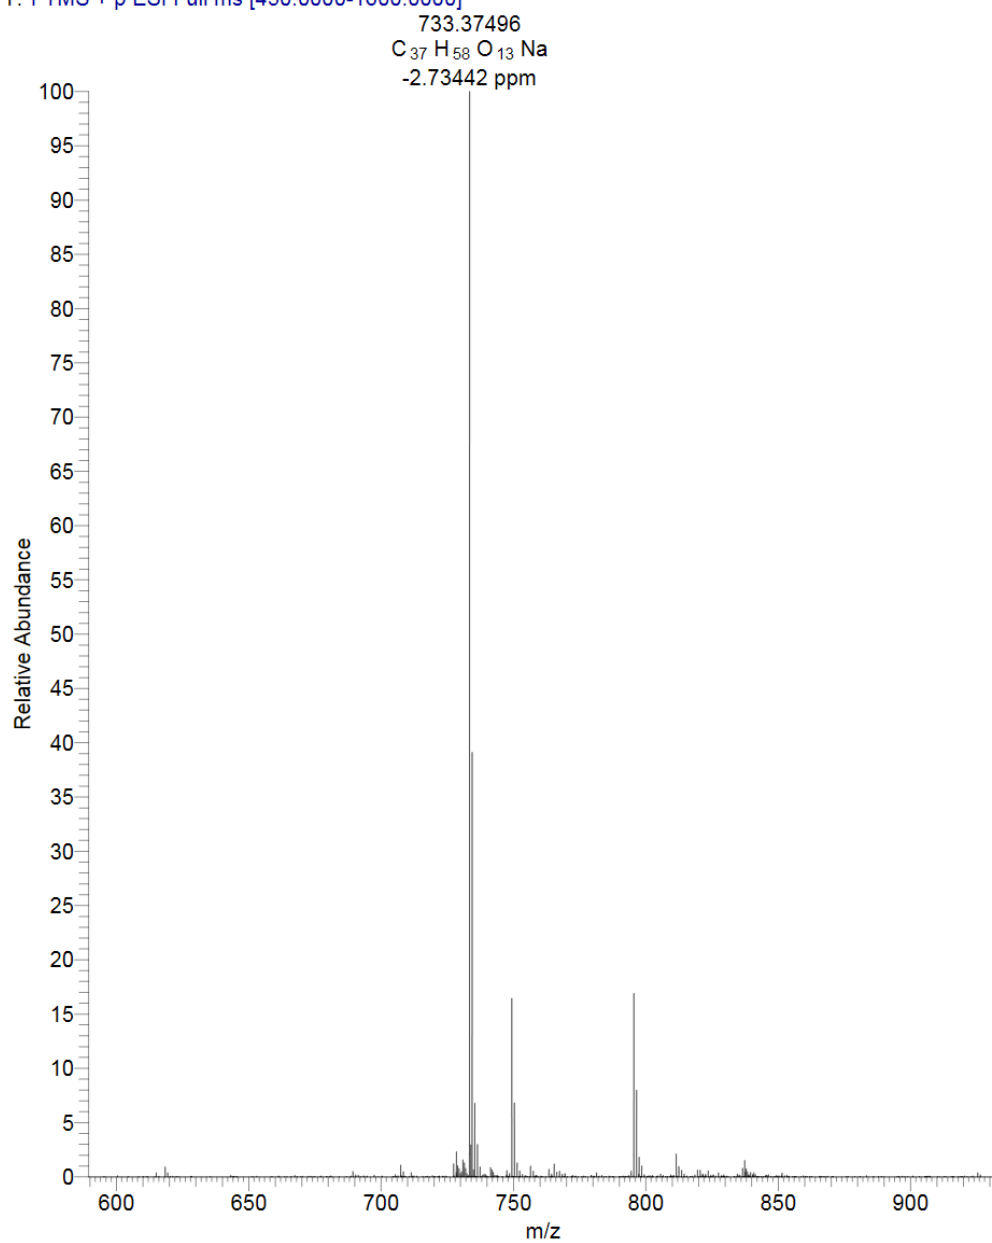

Figure S49. HRESIMS spectrum of Marsdeoside G (7).

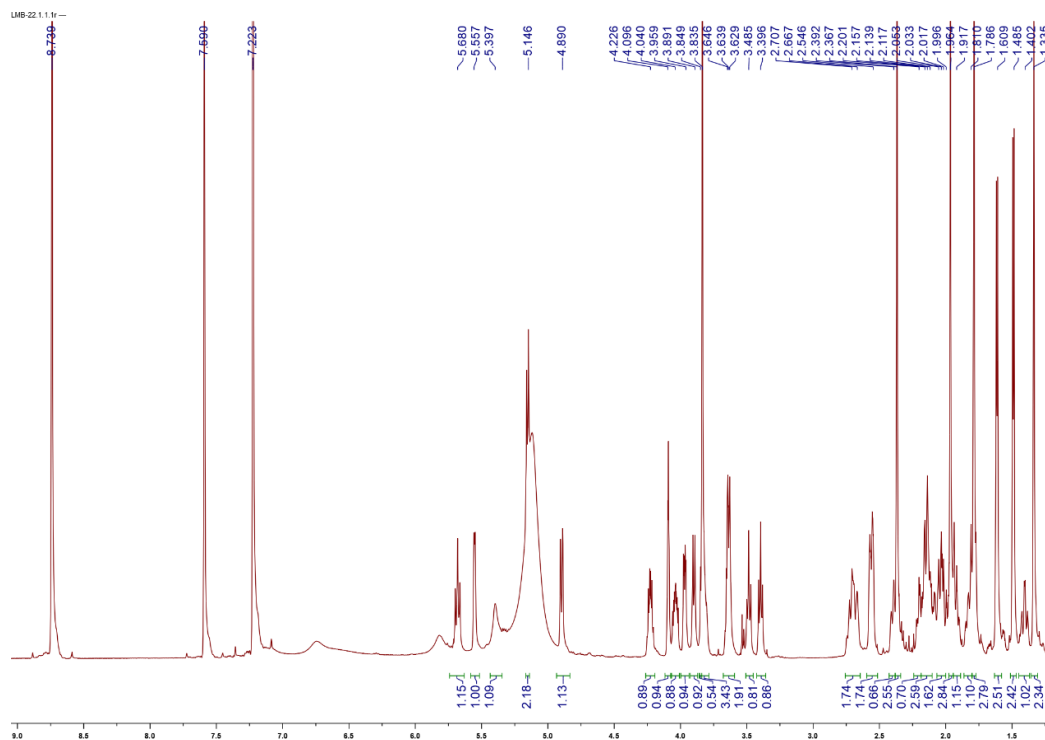

Figure S50. <sup>1</sup>H NMR (600 MHz, Pyridine-d<sub>5</sub>) spectrum of Marsdeoside H (8).

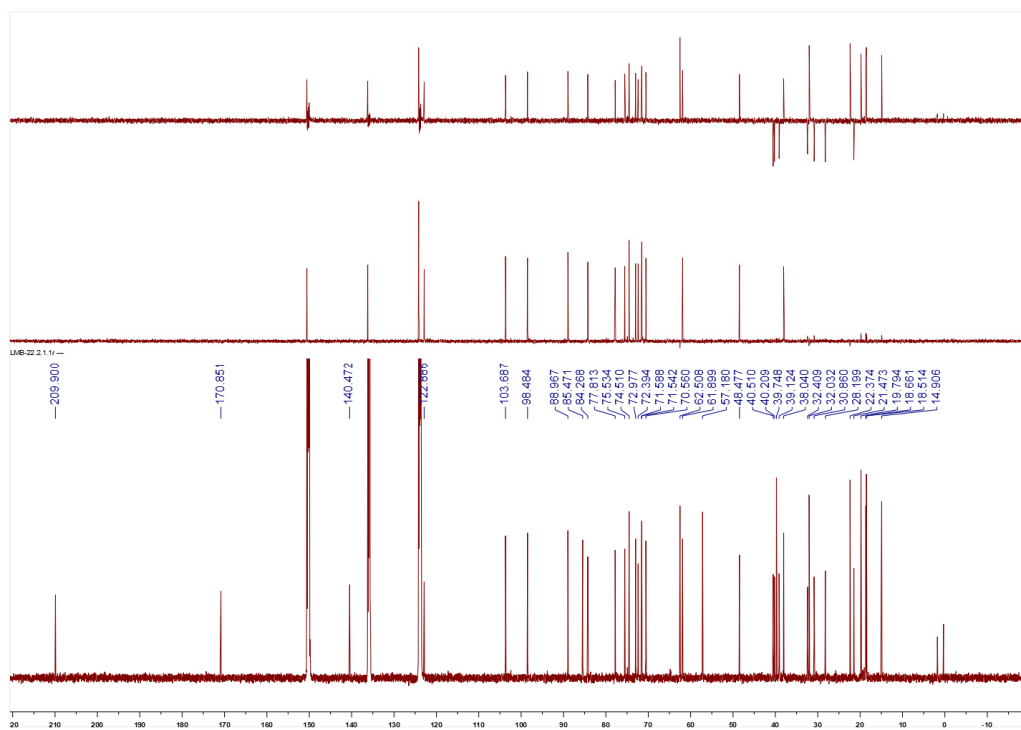

Figure S51. <sup>13</sup>C NMR (150 MHz, Pyridine-d<sub>5</sub>) spectrum of Marsdeoside H (8).

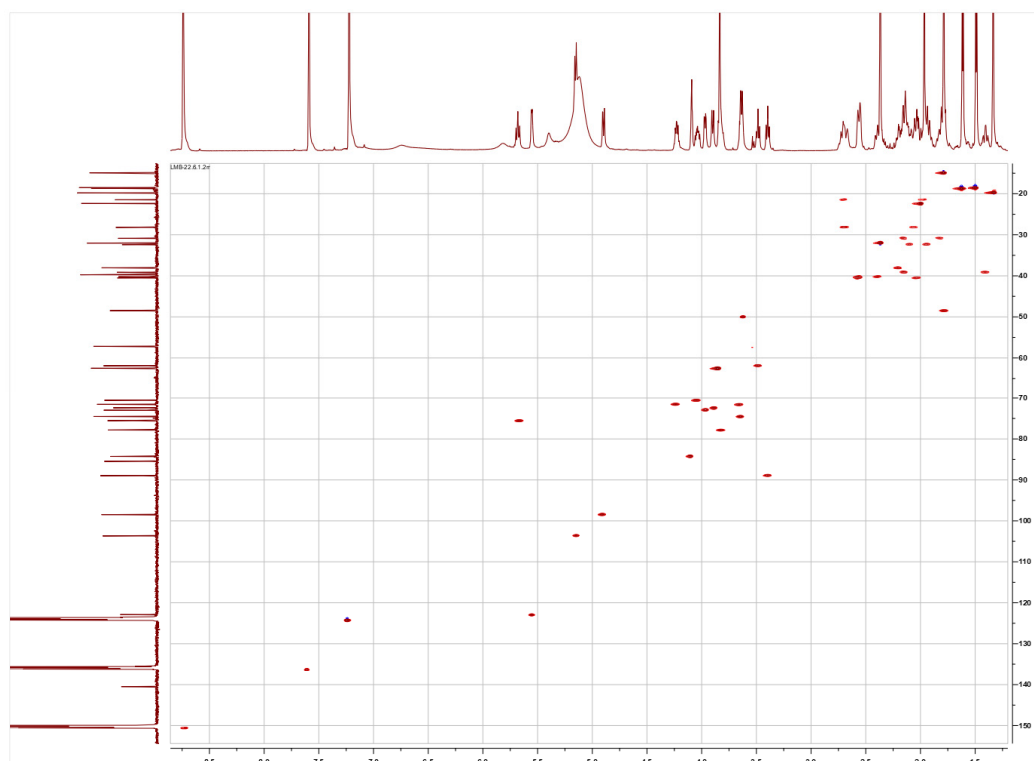

Figure S52. HSQC (600/150 MHz, Pyridine-d<sub>5</sub>) spectrum of Marsdeoside H (8).

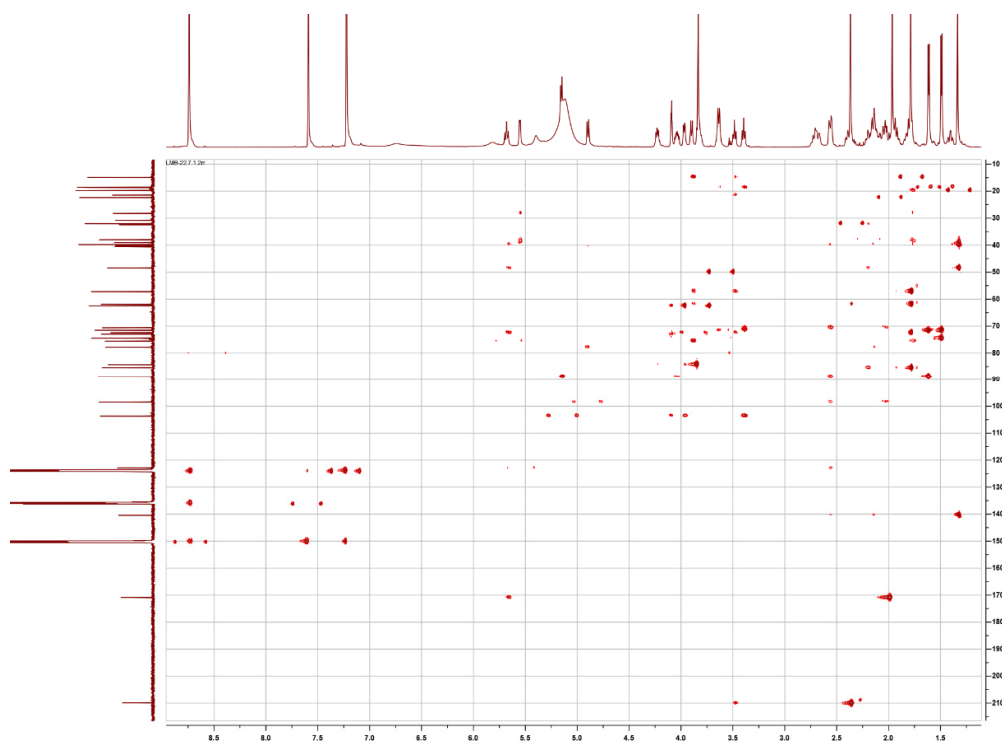

Figure S53. HMBC (600/150 MHz, Pyridine-d<sub>5</sub>) spectrum of Marsdeoside H (8).

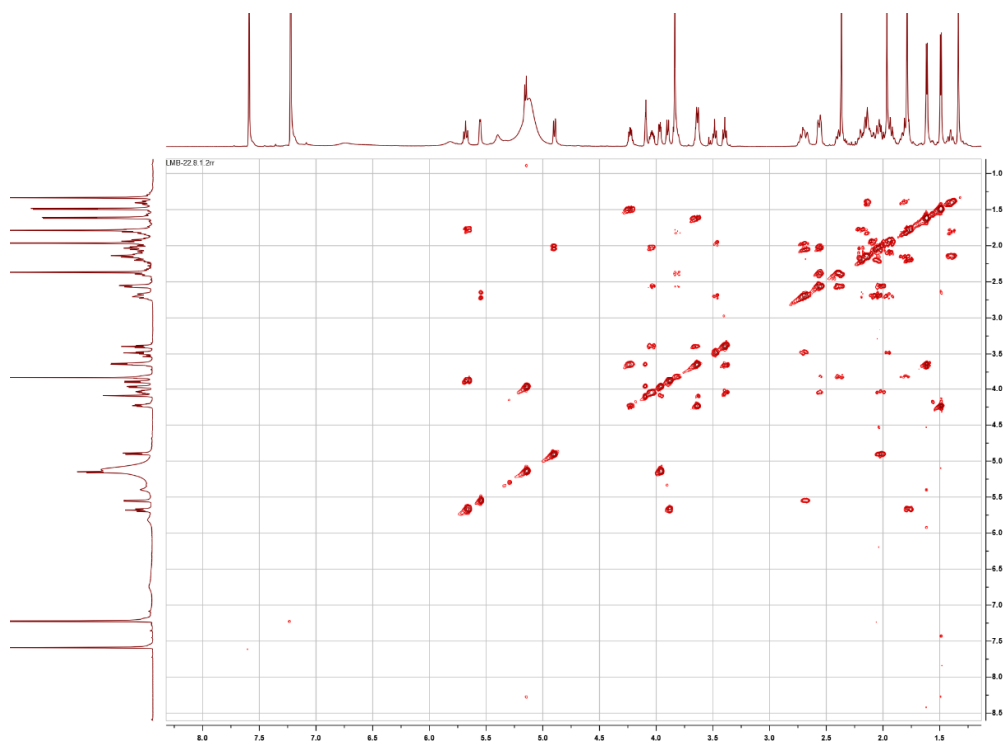

**Figure S54.**  $^1\text{H}$ - $^1\text{H}$  COSY (600/150 MHz,  $\text{Pyridine-d}_5$ ) spectrum of Marsdeoside H (8).

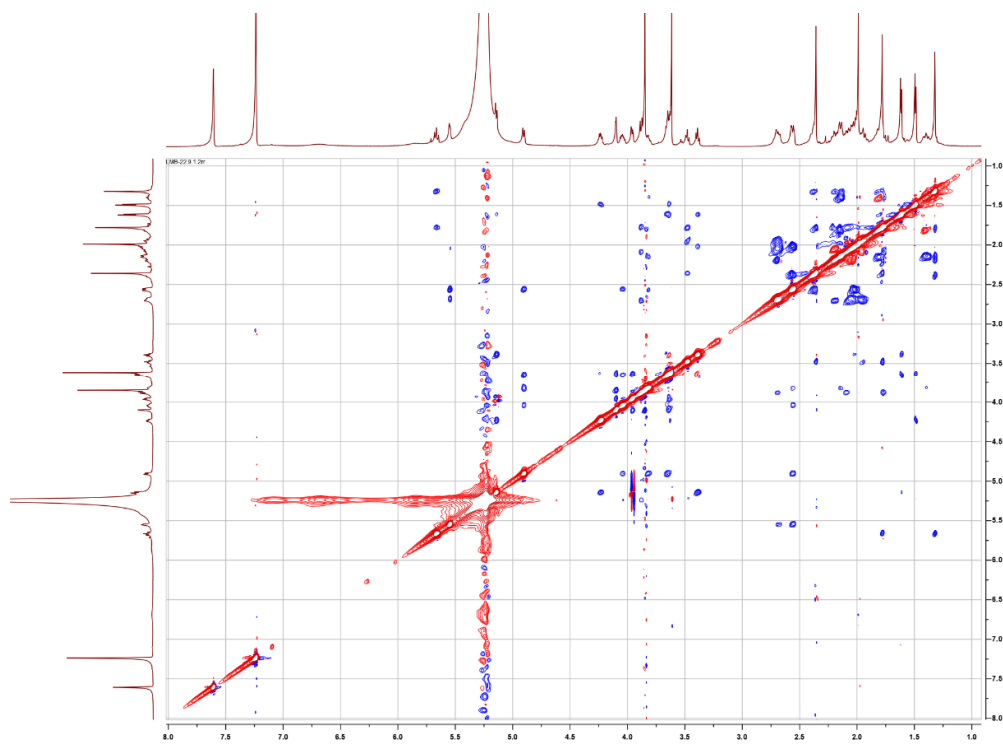

**Figure S55.** NOESY (600/150 MHz,  $\text{Pyridine-d}_5$ ) spectrum of Marsdeoside H (8).

LMB22 #11 RT: 0.14 AV: 1 NL: 4.72E8  
T: FTMS + p ESI Full ms [600.0000-1000.0000]

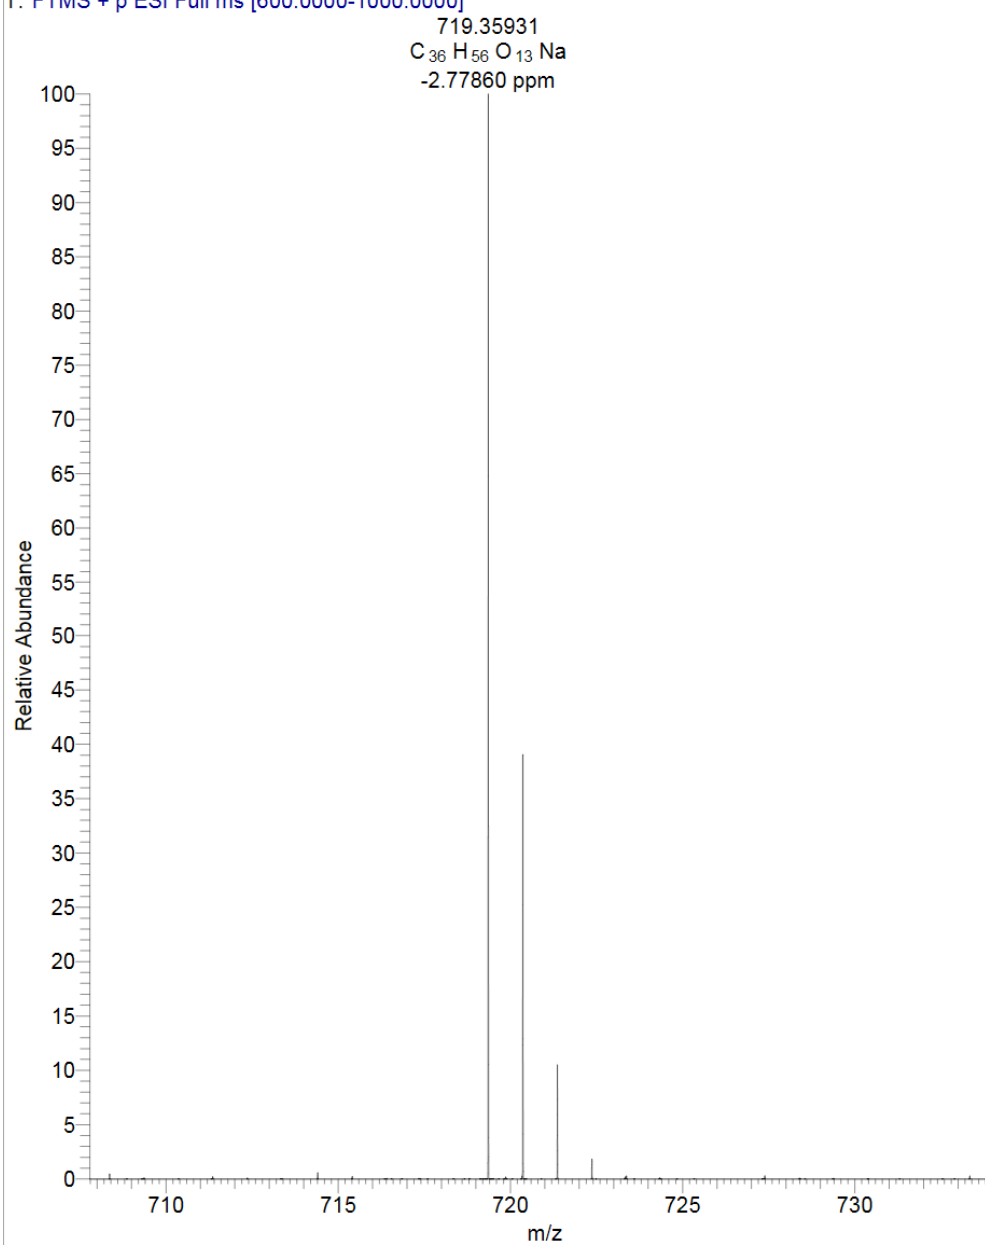

Figure S56. HRESIMS spectrum of Marsdeoside H (8).

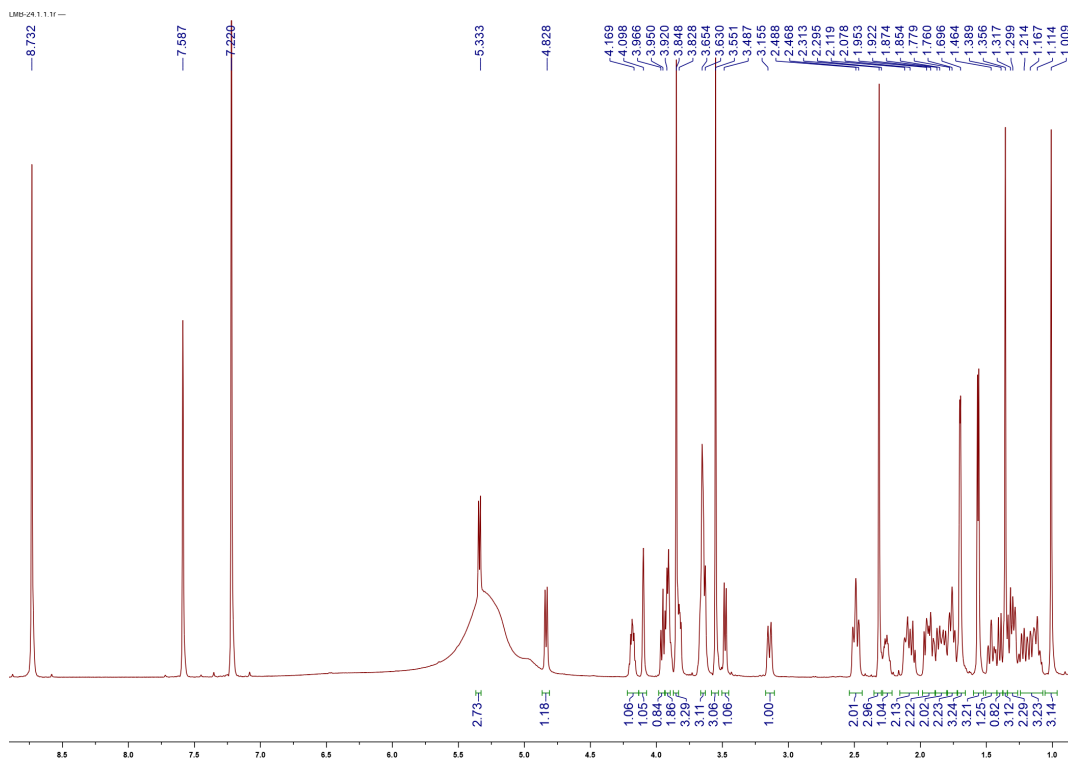

Figure S57.  $^1\text{H}$  NMR (600 MHz, Pyridine- $d_5$ ) spectrum of Marsdeoside H (9).

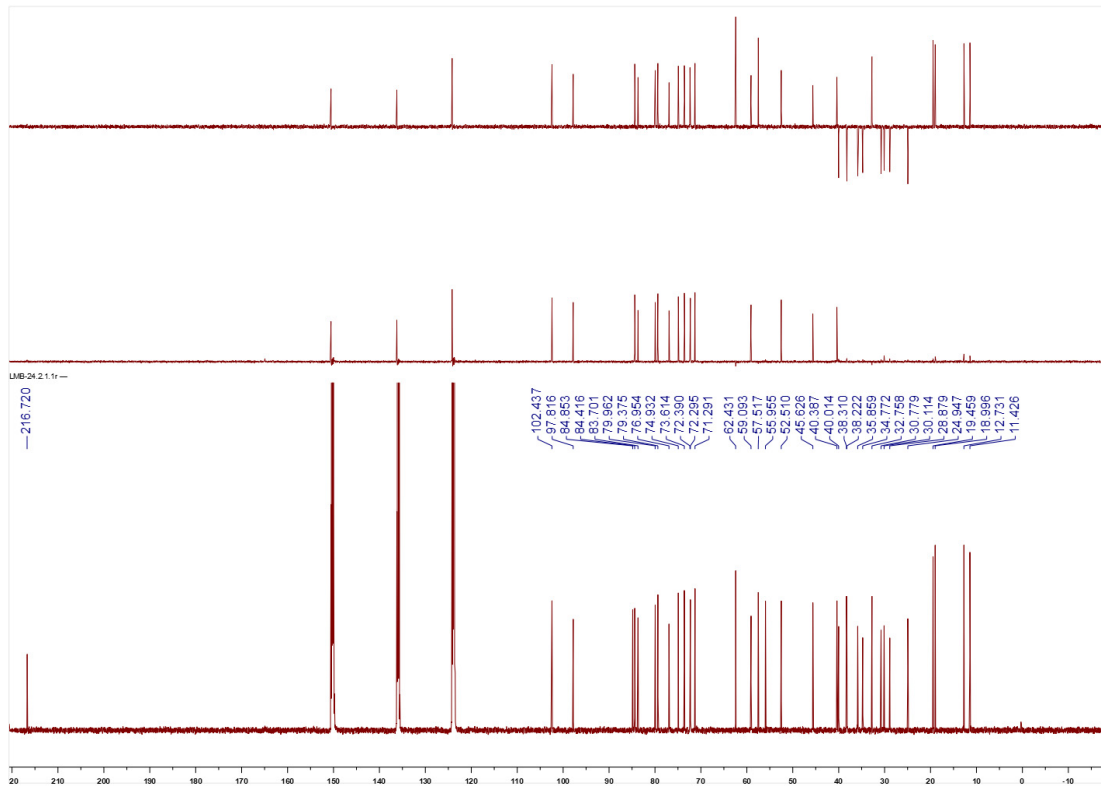

Figure S58.  $^{13}\text{C}$  NMR (150 MHz, Pyridine- $d_5$ ) spectrum of Marsdeoside H (9).

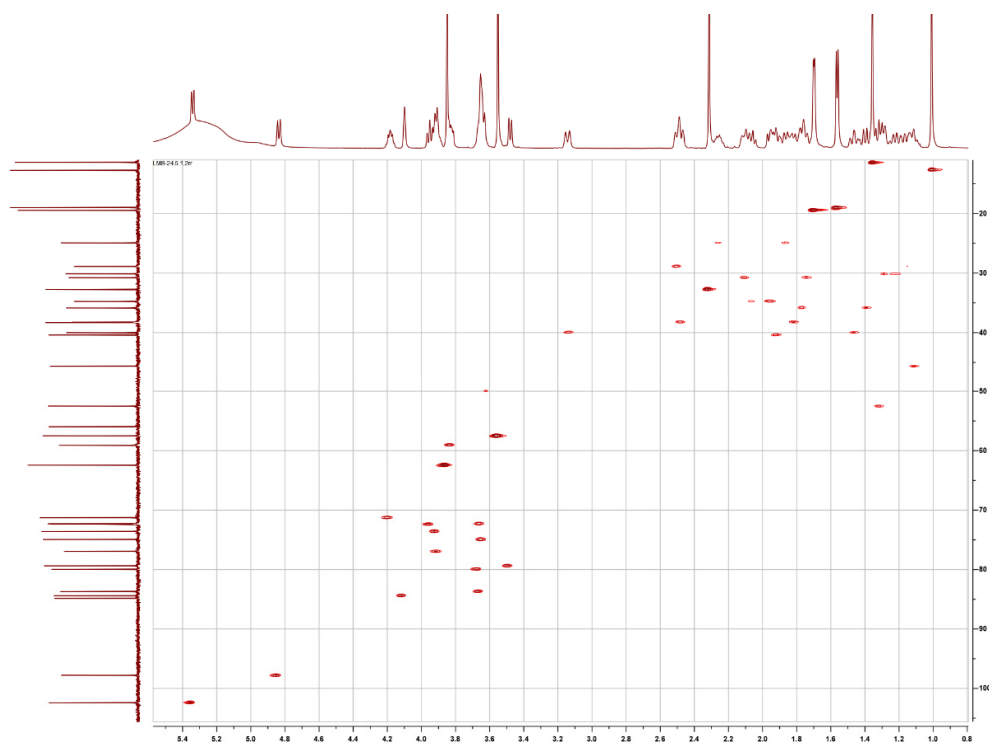

**Figure S59.** HSQC (600/150 MHz, Pyridine-d<sub>5</sub>) spectrum of Marsdeoside H (9).

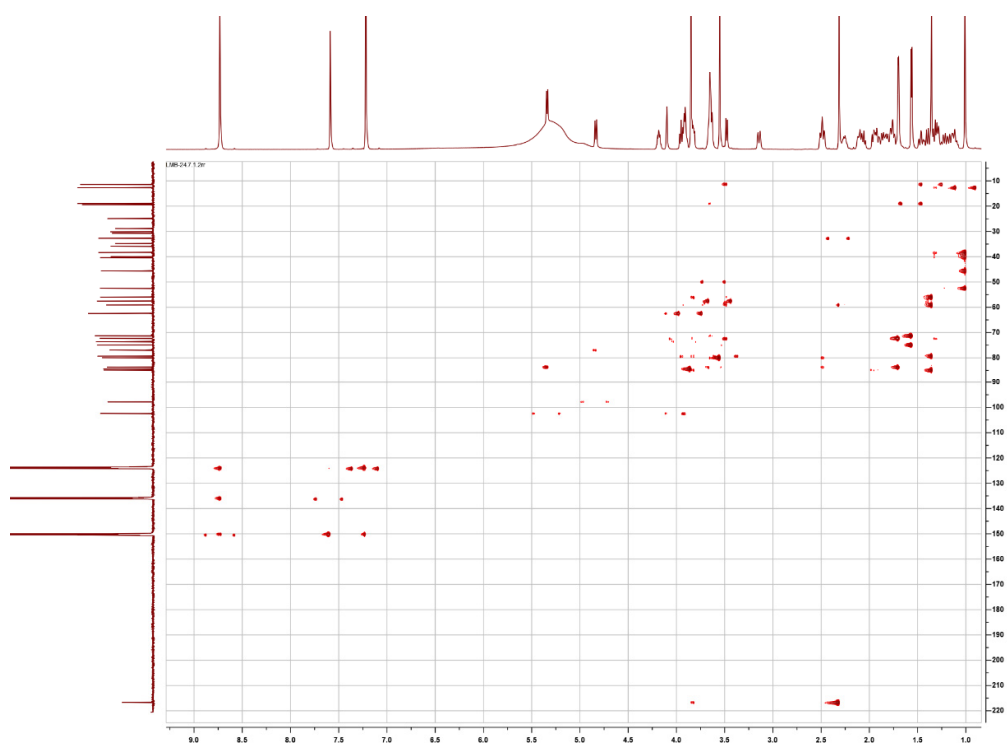

**Figure S60.** HMBC (600/150 MHz, Pyridine-d<sub>5</sub>) spectrum of Marsdeoside H (9).



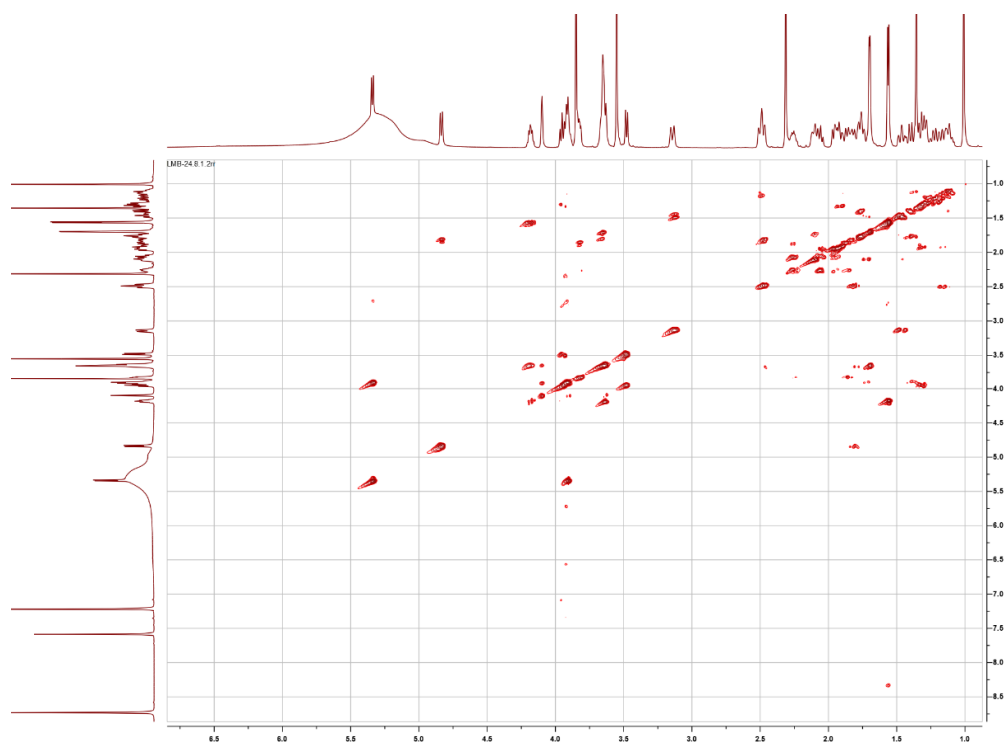

**Figure S61.**  $^1\text{H}$ - $^1\text{H}$  COSY (600/150 MHz, Pyridine- $d_5$ ) spectrum of Marsdeoside H (8).

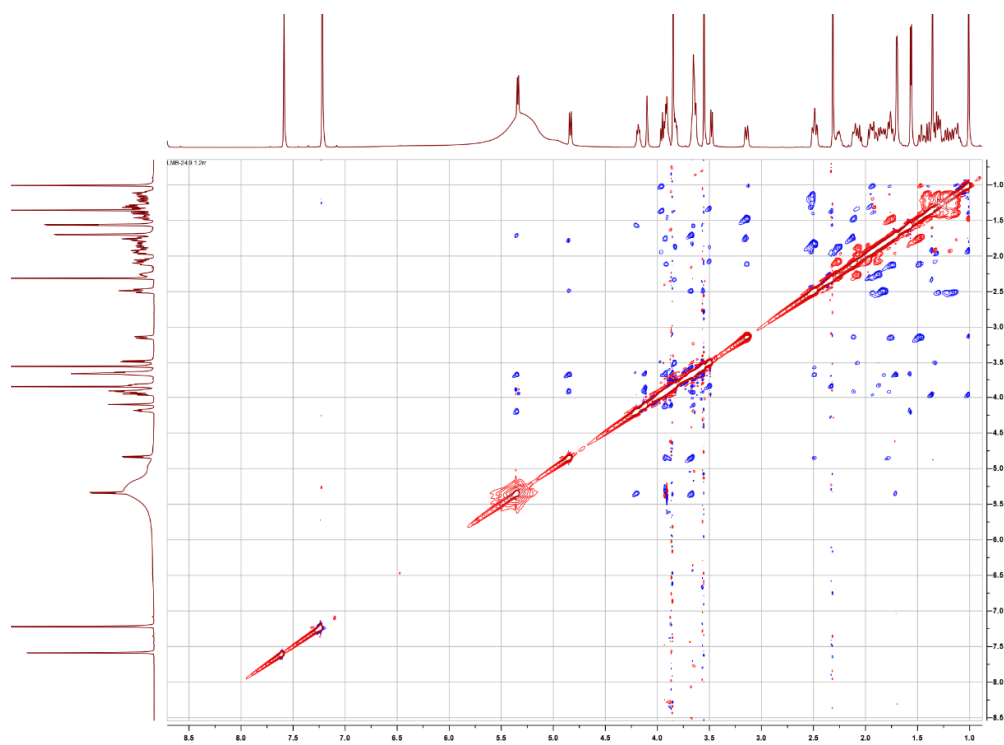

**Figure S62.** NOESY (600/150 MHz, Pyridine- $d_5$ ) spectrum of Marsdeoside H (9).

LMB24 #13 RT: 0.17 AV: 1 SB: 20 1.17-1.73 NL: 1.86E8  
T: FTMS + p ESI Full ms [450.0000-1600.0000]

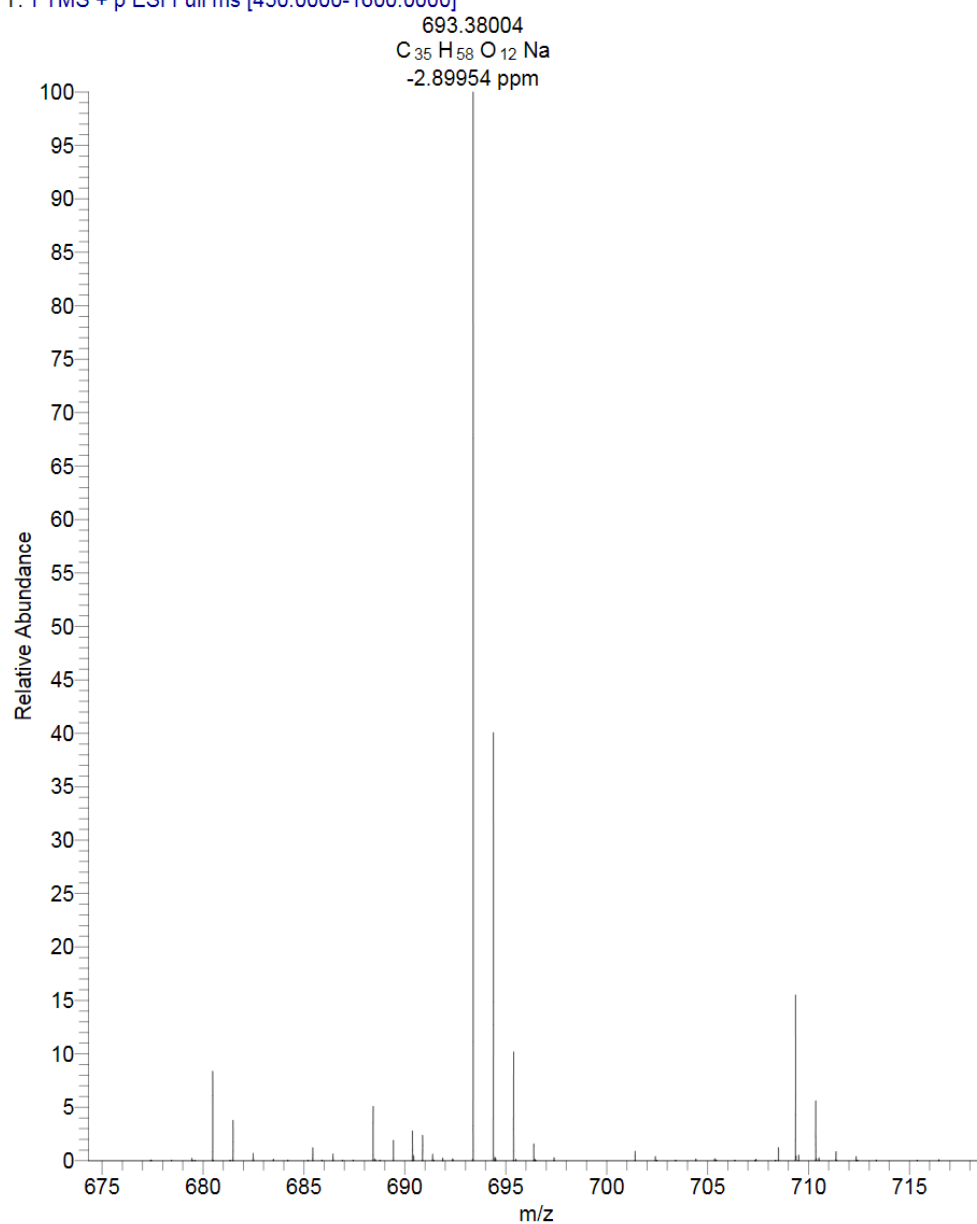

Figure S63. HRESIMS spectrum of Marsdeoside H (9).
